# Supplementary material for: Peptidomic and in silico screening of six novel antioxidant and hepatoprotective peptides in Musculus senhousei: The vital role of Trp residue
Source: Royal Society of Chemistry journal article supplement (doi:10.1039/d5fo04444h), 2026-01-01
Supplement: d5fo04444h1.xlsx [file d5fo04444h1.xlsx]

## Sheet: Table S1
Table S1 Peptides identified from fraction F8-11 and F15-6 separated by HPLC
No.	Fraction	Sequence	Meas.mz	Mr	Length	Accesions
1	F8-11	KLT	403.255	402.248	3	Q25460;Q9BP78;P0CY64;Q2I2R0;O76997;
2	F8-11	SK	276.155	275.148	2	Q8WR62;Q86MA7;Q25434;B3A0S2;P24733;
3	F8-11	KPOGPQ	681.356	680.349	6
4	F8-11	YEEL	553.251	552.243	4
5	F8-11	FVVS	493.266	492.258	4	Q16951;B3A0Q7;
6	F8-11	FCWL	610.271	609.262	4
7	F8-11	FPLE	521.261	520.253	4	D6C4L8;P51544;
8	F8-11	RSPWR	743.396	742.387	5
9	F8-11	FTVTS	596.293	595.285	5
10	F8-11	PAGGL	456.245	455.238	5
11	F8-11	MASKLT	666.345	665.342	6
12	F8-11	SGYSDL	683.289	682.281	6
13	F8-11	FSNPDS	680.288	679.281	6
14	F8-11	YQQQLT	780.388	779.381	6
15	F8-11	FEPGGS	635.266	634.26	6
16	F8-11	FDPET	608.257	607.249	5
17	F8-11	MIEEAED	836.332	835.327	7	O96064;
18	F8-11	KDVPQ	628.33	627.323	5
19	F8-11	NGNHAD	669.253	668.251	6
20	F8-11	YGGLDS	625.283	624.276	6
21	F8-11	FGGSLS	567.277	566.27	6
22	F8-11	FDEQEM	814.294	813.285	6
23	F8-11	FCVR	566.283	565.268	4
24	F8-11	FLFLT	654.382	653.379	5
25	F8-11	WGGDDM	696.229	695.222	6
26	F8-11	YDPPTS	693.309	692.302	6
27	F8-11	FVDAE	596.257	595.249	5
28	F8-11	FPWCDD	824.294	823.285	6
29	F8-11	FDPSVD	693.306	692.302	6
30	F8-11	FLTDD	624.288	623.28	5
31	F8-11	KGEPL	585.324	584.317	5
32	F8-11	KDL	417.234	416.227	3	V5NAL9;P0DKQ8;Q10583;O61363;P30682;
33	F8-11	KGDPL	571.309	570.301	5
34	F8-11	KGPL	456.282	455.274	4	A5GZY1;
35	F8-11	KTIGGGDDS	891.405	890.398	9	P41383;Q8T6A5;
36	F8-11	FDAELN	724.315	723.308	6
37	F8-11	FDDLEN	768.304	767.297	6
38	F8-11	WWSQNQ	864.373	863.356	6
39	F8-11	YSDZDD	1138.47	1137.46	6
40	F8-11	FTSAPE	665.314	664.307	6
41	F8-11	FCGICL	669.307	668.303	6
42	F8-11	LSGGME	635.271	634.263	6
43	F8-11	RDAELA	716.358	715.35	6
44	F8-11	KGSAPE	630.311	629.302	6
45	F8-11	KEDPPQ	755.358	754.35	6
46	F8-11	EVAVGP	585.325	584.317	6
47	F8-11	VGGYSN	638.28	637.271	6
48	F8-11	YPPSVD	693.309	692.302	6
49	F8-11	NTPKPN	684.368	683.36	6
50	F8-11	FEVDAE	725.298	724.292	6
51	F8-11	FPEASD	679.293	678.286	6
52	F8-11	YKPAPQ	745.391	744.381	6
53	F8-11	FSSAPS	637.282	636.276	6
54	F8-11	FAGEDE	667.254	666.25	6
55	F8-11	ENLSLQ	745.372	744.365	6
56	F8-11	ENLSLS	704.347	703.339	6
57	F8-11	FVTADD	681.308	680.302	6	P69762;Q3YED8;Q9BPA2;P58913;Q3YED5;
58	F8-11	NPYMPS	750.313	749.305	6
59	F8-11	FENLEQ	821.364	820.36	6
60	F8-11	RECSNL	763.346	762.333	6
61	F8-11	FDLGGGT	682.304	681.297	7	Q16956;
62	F8-11	FCDRDW	855.336	854.338	6
63	F8-11	FPPCKS	720.347	719.331	6
64	F8-11	KADQPV	699.367	698.36	6
65	F8-11	FDWLAD	782.338	781.328	6
66	F8-11	WGWEVE	819.371	818.36	6
67	F8-11	FPSLEE	737.335	736.328	6
68	F8-11	LGGSSL	575.305	574.296	6
69	F8-11	WYPPCL	794.357	793.347	6
70	F8-11	KQEQEV	802.395	801.387	6
71	F8-11	LSNNGL	659.335	658.329	6
72	F8-11	WTPPW	700.352	699.338	5
73	F8-11	FPGTT	564.266	563.259	5
74	F8-11	KILPK	640.439	639.432	5	A0A2I6EDN2;
75	F8-11	YPPTN	607.274	606.265	5
76	F8-11	FVTKD	623.34	622.333	5
77	F8-11	RPSVG	557.295	556.297	5
78	F8-11	FDSLS	610.269	609.265	5
79	F8-11	FRGGS	565.263	564.266	5
80	F8-11	FGMRQ	680.325	679.311	5
81	F8-11	MATTV	538.251	537.247	5
82	F8-11	FSKEQ	680.325	679.318	5	B3A0P3;
83	F8-11	FDDSL	610.272	609.265	5
84	F8-11	LSGSL	518.282	517.275	5
85	F8-11	YSVDA	596.257	595.249	5
86	F8-11	SDPVL	572.293	571.285	5	A9ZPC9;
87	F8-11	WTRPE	730.361	729.345	5
88	F8-11	KASPL	557.33	556.322	5
89	F8-11	FGRPM	623.29	622.29	5
90	F8-11	KGVPE	571.309	570.301	5
91	F8-11	FDPVF	666.31	665.306	5	Q10583;Q10584;P12031;
92	F8-11	FQKDD	666.309	665.302	5
93	F8-11	YSVDP	594.278	593.27	5
94	F8-11	RAUZ	919.402	918.395	4
95	F8-11	FAHR	546.278	545.271	4
96	F8-11	RCDI	548.257	547.242	4
97	F8-11	LGGV	359.228	358.222	4	P0DUE1;O47477;P48884;Q967R6;O61363;
98	F8-11	KSPL	486.292	485.285	4	P13952;P30682;P51876;P30683;P51877;
99	F8-11	KSLM	520.278	519.273	4
100	F8-11	KNPL	513.304	512.296	4	Q8T697;A9ZPC9;
101	F8-11	FVEN	550.252	549.243	4	P02637;
102	F8-11	KFAO	520.277	519.269	4
103	F8-11	WZGO	899.429	898.431	4
104	F8-11	KPPL	496.313	495.306	4
105	F8-11	MIEEAEDV	935.403	934.395	8	O96064;
106	F8-11	WDDL	590.25	589.238	4
107	F8-11	WVPR	599.339	598.323	4
108	F8-11	WGIW	575.305	574.29	4
109	F8-11	EPGL	457.229	456.222	4	H2A0L8;Q10583;O61363;P56824;H2A0N5;
110	F8-11	FEIGGGE	724.315	723.308	7	P12659;O61363;
111	F8-11	MZE	803.378	802.366	3
112	F8-11	VLEQEE	746.356	745.349	6
113	F8-11	RZR	428.25	854.485	3
114	F8-11	FFGMGH	711.283	710.285	6
115	F8-11	LTASVD	619.33	618.322	6
116	F8-11	RDMYDR	871.379	870.365	6
117	F8-11	FPGTSS	637.282	636.276	6
118	F8-11	MWSSEW	841.32	840.311	6
119	F8-11	KYDTDL	768.376	767.37	6
120	F8-11	LMDDDD	737.264	736.259	6
121	F8-11	EVAVDP	643.327	642.322	6	H2A0L8;
122	F8-11	FMDENW	855.336	854.327	6
123	F8-11	WTAEAS	706.307	705.297	6
124	F8-11	LPVDDD	687.32	686.312	6
125	F8-11	FPSVPN	674.356	673.344	6
126	F8-11	RSSDGD	650.273	649.267	6
127	F8-11	FGNGGT	594.243	593.245	6
128	F8-11	WAIWNE	860.401	859.386	6
129	F8-11	FPGSGD	621.252	620.244	6
130	F8-11	FDADLE	725.299	724.292	6
131	F8-11	RSTSDE	710.3	709.288	6
132	F8-11	RGCPPT	644.327	643.311	6
133	F8-11	RALEQE	761.37	760.372	6
134	F8-11	SFTEAE	725.298	724.292	6
135	F8-11	EAAKPT	630.346	629.338	6
136	F8-11	QWMGMD	781.303	780.293	6
137	F8-11	RAEMPQ	745.367	744.359	6
138	F8-11	FGLGEE	693.309	692.302	6
139	F8-11	YPPPTD	705.312	704.302	6
140	F8-11	WEGRMM	823.359	822.352	6
141	F8-11	EAAAVQ	630.31	629.302	6
142	F8-11	FVGGEE	653.278	652.27	6
143	F8-11	KDDELE	764.33	763.324	6
144	F8-11	FDSVDN	710.299	709.292	6
145	F8-11	DGRNET	705.313	704.309	6
146	F8-11	WMWWGE	936.363	935.364	6
147	F8-11	KPGSLT	644.361	643.354	6
148	F8-11	RAWTAQ	774.398	773.382	6
149	F8-11	FDCVMQ	784.301	783.293	6
150	F8-11	FDPADE	709.264	708.26	6
151	F8-11	FDPELG	693.309	692.302	6
152	F8-11	QQPAPK	710.382	709.376	6
153	F8-11	RSTSSE	708.32	707.309	6
154	F8-11	AASADL	561.289	560.281	6
155	F8-11	RACQLT	733.373	732.359	6
156	F8-11	RMDIPK	801.436	800.421	6
157	F8-11	RDVPLN	755.405	754.397	6
158	F8-11	KDKDFE	823.386	822.376	6
159	F8-11	ETYPQW	865.375	864.365	6
160	F8-11	RGCQLN	732.34	731.338	6
161	F8-11	MVRLNN	762.401	761.385	6
162	F8-11	SVGGSL	561.288	560.281	6
163	F8-11	RGQFEE	807.354	806.356	6
164	F8-11	SGVYEE	725.293	724.292	6
165	F8-11	FDNGRC	725.295	724.296	6
166	F8-11	FISDGD	667.292	666.286	6
167	F8-11	FDCRDD	784.294	783.286	6
168	F8-11	FPTYPP	737.35	736.343	6
169	F8-11	FPGSGN	592.273	591.265	6
170	F8-11	YFMMMM	869.301	868.299	6
171	F8-11	FWGYOH	838.355	837.345	6
172	F8-11	FPPWPQ	813.399	812.386	6
173	F8-11	RAASLE	688.354	687.355	6
174	F8-11	FDPADQ	708.285	707.276	6
175	F8-11	WGRRDQ	859.417	858.41	6
176	F8-11	WOWLDN	860.397	859.386	6
177	F8-11	DTVVLT	689.374	688.364	6
178	F8-11	FOLQPQ	759.404	758.396	6
179	F8-11	QPVFAE	706.34	705.333	6
180	F8-11	QQWPGT	730.361	729.345	6
181	F8-11	EDMLRT	806.367	805.364	6
182	F8-11	RADWPT	787.38	786.366	6
183	F8-11	QLDVPS	700.349	699.344	6
184	F8-11	FVGQSS	666.309	665.302	6
185	F8-11	SPTYPS	693.305	692.302	6
186	F8-11	WGZ	770.403	769.388	3
187	F8-11	FGZ	773.389	772.388	3
188	F8-11	MATTVQ	692.325	691.321	6
189	F8-11	RSTSSS	666.309	665.298	6
190	F8-11	FCT	412.154	411.146	3	A0A125S9F9;P0DN64;V5NAL9;P0DKN0;A0A125S9G0;
191	F8-11	EVNNGL	659.335	658.329	6
192	F8-11	FSYANH	780.322	779.324	6
193	F8-11	DPFFPL	777.381	776.374	6
194	F8-11	RASNGL	659.338	658.34	6
195	F8-11	FAGDQL	666.31	665.302	6
196	F8-11	LGGGEL	559.309	558.301	6
197	F8-11	FRW	550.287	549.27	3	H2A0N8;Q0H293;Q9BP70;Q9BP63;P0C8G6;
198	F8-11	EAASDL	619.293	618.286	6
199	F8-11	EYDESGPS	883.333	882.324	8	Q964D9;P92179;Q964E1;Q964E2;Q964E0;
200	F8-11	RDELE	703.326	702.318	5
201	F8-11	FPYOE	710.301	709.296	5
202	F8-11	TVMPK	589.338	588.331	5
203	F8-11	YGSPE	594.241	593.233	5
204	F8-11	YTVPK	311.184	620.353	5
205	F8-11	FVNPT	591.314	590.306	5
206	F8-11	PSVDE	588.252	587.244	5
207	F8-11	YSVDN	611.268	610.26	5
208	F8-11	FLLYT	672.358	671.353	5
209	F8-11	KYDVP	635.341	634.333	5	Q9BPG5;Q9BPG3;
210	F8-11	RGGGW	574.273	573.266	5
211	F8-11	FMATP	582.26	581.252	5
212	F8-11	FDAEA	594.242	593.233	5
213	F8-11	LSVNS	561.289	560.281	5
214	F8-11	QFEDE	667.257	666.25	5
215	F8-11	ESKLT	619.33	618.322	5
216	F8-11	FPLEN	635.304	634.296	5
217	F8-11	FVWCP	693.309	692.299	5
218	F8-11	FVGDE	608.26	607.249	5
219	F8-11	FAEAE	608.26	607.249	5
220	F8-11	WKTZN	1056.57	1055.55	5
221	F8-11	WTPPL	655.341	654.338	5
222	F8-11	FEPGS	550.252	549.243	5
223	F8-11	LSSDL	576.288	575.28	5
224	F8-11	MADDV	564.235	563.226	5
225	F8-11	RAPHF	641.361	640.345	5
226	F8-11	FDELN	637.284	636.276	5
227	F8-11	SGLLT	532.298	531.29	5
228	F8-11	FCGKR	652.331	651.316	5
229	F8-11	LSSEL	590.304	589.296	5
230	F8-11	HCHQE	667.255	666.254	5
231	F8-11	YGSLE	610.271	609.265	5
232	F8-11	FLGPT	550.287	549.28	5	P48918;
233	F8-11	MSALE	566.247	565.242	5
234	F8-11	LSLSS	548.293	547.285	5
235	F8-11	EAFDL	610.272	609.265	5	Q9GSL0;B6E465;P91889;P81431;Q10584;
236	F8-11	WRRPE	759.385	758.382	5
237	F8-11	RDWQR	802.398	801.388	5
238	F8-11	ETWSE	665.281	664.27	5
239	F8-11	LEEVD	618.297	617.291	5
240	F8-11	WARAH	654.346	653.34	5
241	F8-11	LEEEL	632.317	631.306	5	Q9GZ69;Q9GZ71;Q95WY0;Q2V0V2;P43689;
242	F8-11	MPQLR	686.372	685.358	5
243	F8-11	ESEWR	748.318	747.319	5
244	F8-11	YPSVD	594.278	593.27	5
245	F8-11	FTETR	334.176	666.334	5
246	F8-11	FDADL	594.277	593.27	5
247	F8-11	EPMVR	673.339	672.327	5
248	F8-11	KDDDL	619.294	618.286	5	Q25077;
249	F8-11	KQYAF	698.346	697.344	5
250	F8-11	WILPE	699.368	698.364	5
251	F8-11	WIEPL	699.367	698.364	5
252	F8-11	KGSPL	543.315	542.306	5
253	F8-11	FDSDL	610.272	609.265	5
254	F8-11	NGMRF	666.309	665.296	5
255	F8-11	DSLSL	576.288	575.28	5
256	F8-11	NVEPL	585.325	584.317	5
257	F8-11	NVPEM	631.273	630.268	5
258	F8-11	NK	275.171	274.164	2	P24733;Q10583;O61363;H2A0N4;B3A0P8;
259	F8-11	LN	262.14	261.132	2	O61363;Q10583;Q25410;Q10584;P24733;
260	F8-11	WFZC	503.23	1004.46	4
261	F8-11	YPNPPQ	365.182	728.349	6
262	F8-11	KDDPAD	702.294	701.287	6
263	F8-11	RGVPPT	642.347	641.35	6
264	F8-11	WEWSAW	906.369	905.371	6
265	F8-11	KLEGEK	745.409	744.402	6
266	F8-11	QSPLNE	703.327	702.318	6
267	F8-11	RSALEE	746.359	745.361	6
268	F8-11	RP	272.172	271.164	2	Q86MA7;P15513;Q25410;Q25413;Q10584;
269	F8-11	RASFDE	740.312	739.314	6
270	F8-11	EAAKPL	642.382	641.375	6
271	F8-11	FNWR	664.329	663.313	4	P58811;
272	F8-11	RECAPE	718.323	717.312	6
273	F8-11	MVEPED	735.285	734.279	6
274	F8-11	FEPEEA	763.319	762.307	6
275	F8-11	NMSTDY	772.281	771.275	6
276	F8-11	QPAITQ	699.367	698.36	6
277	F8-11	QLEGPQ	685.352	684.344	6
278	F8-11	SIPDGQ	658.303	657.297	6
279	F8-11	ELKTHT	744.387	743.381	6
280	F8-11	WWEDGS	821.312	820.303	6
281	F8-11	FDAVEQ	724.315	723.308	6
282	F8-11	QWWEWW	1062.44	1061.44	6
283	F8-11	WCETVE	782.304	781.295	6
284	F8-11	KYEEAL	768.377	767.37	6
285	F8-11	RADDVA	688.317	687.319	6
286	F8-11	SALEEE	719.306	718.302	6
287	F8-11	EGGEER	692.292	691.277	6
288	F8-11	MSTLEE	725.309	724.295	6
289	F8-11	KTEDEE	764.33	763.324	6
290	F8-11	ERLW	645.338	644.328	4	H2A0L6;P86956;
291	F8-11	MGVZAO	507.759	1013.5	6
292	F8-11	DGDLIQ	674.332	673.328	6
293	F8-11	ECFFYW	936.362	935.352	6
294	F8-11	FDMWWC	901.327	900.33	6
295	F8-11	RSPACQ	675.319	674.317	6
296	F8-11	WPGDLR	785.404	784.387	6	P91778;
297	F8-11	QMPINW	830.383	829.379	6
298	F8-11	DTKDDV	734.318	733.313	6
299	F8-11	FTYPGW	812.364	811.354	6
300	F8-11	LDSVDA	661.301	660.297	6
301	F8-11	WWQEWW	1062.44	1061.44	6
302	F8-11	DLALEK	688.385	687.38	6
303	F8-11	KGNNPE	700.325	699.319	6
304	F8-11	KGKSGH	655.343	654.345	6
305	F8-11	RTCIHT	744.388	743.375	6
306	F8-11	FCDRLT	796.36	795.359	6
307	F8-11	RSEQEQ	792.354	791.341	6
308	F8-11	FLGKGH	672.393	671.375	6
309	F8-11	EEAEKE	776.327	775.324	6	A3RLT6;
310	F8-11	FPGSSS	623.27	622.26	6
311	F8-11	RDLELE	816.411	815.403	6
312	F8-11	WGMWWE	936.366	935.364	6
313	F8-11	QNVLQK	771.436	770.429	6
314	F8-11	ETRDGD	708.286	707.272	6
315	F8-11	FPML	549.267	548.267	4
316	F8-11	EGWLRS	789.399	788.382	6
317	F8-11	WGWR	620.303	619.287	4
318	F8-11	YGYSVL	715.362	714.359	6
319	F8-11	KDDDLA	718.321	717.318	6
320	F8-11	SGALLT	603.337	602.328	6
321	F8-11	EFAWDQ	837.336	836.334	6
322	F8-11	PNAVLG	612.335	611.328	6
323	F8-11	FMFPRH	425.708	849.396	6
324	F8-11	YPADDD	709.267	708.26	6
325	F8-11	EEVDLE	749.311	748.313	6
326	F8-11	WZMS	474.228	946.434	4
327	F8-11	RSAELQ	745.389	744.377	6
328	F8-11	VCQLRE	789.4	788.385	6
329	F8-11	FNNPET	737.3	736.303	6
330	F8-11	FEVAAS	639.299	638.291	6
331	F8-11	ERSASD	680.292	679.277	6
332	F8-11	EQEKLT	761.404	760.397	6
333	F8-11	MVTASD	639.263	638.258	6
334	F8-11	EDLTEE	749.31	748.313	6
335	F8-11	EARWED	819.371	818.356	6
336	F8-11	RMML	566.282	565.272	4	P86727;B3A0R1;
337	F8-11	EGSNPL	630.309	629.302	6
338	F8-11	FDKDEA	740.309	739.302	6
339	F8-11	MVPR	516.305	515.289	4	O01391;B3A0R8;
340	F8-11	LFPAPQ	688.366	687.359	6
341	F8-11	TTSSML	681.309	680.305	6
342	F8-11	FALRST	736.389	735.392	6
343	F8-11	EASGVF	623.304	622.296	6
344	F8-11	NKLGLG	643.376	642.37	6
345	F8-11	WCPFDD	824.295	823.285	6
346	F8-11	QELAGA	630.31	629.302	6
347	F8-11	DKRAPS	715.363	714.366	6
348	F8-11	FDESPR	792.362	791.345	6
349	F8-11	FNDLEN	751.326	750.318	6
350	F8-11	WGWAFH	845.38	844.366	6
351	F8-11	RIQSPT	715.418	714.402	6
352	F8-11	WFHFEQ	909.395	908.382	6
353	F8-11	WTASAP	648.298	647.291	6
354	F8-11	RSTSVD	706.343	705.329	6
355	F8-11	RACQFQ	752.357	751.344	6
356	F8-11	WRMQ	634.319	633.306	4
357	F8-11	DPVFVD	733.335	732.333	6
358	F8-11	WPPWTV	799.42	798.406	6
359	F8-11	FDPELM	793.336	792.336	6
360	F8-11	ETMLLQ	776.38	775.379	6
361	F8-11	WVGKGH	699.367	698.35	6
362	F8-11	RSDDFD	770.303	769.288	6
363	F8-11	QVLM	506.263	505.257	4	Q06BR2;Q00232;
364	F8-11	WRCK	634.319	633.306	4
365	F8-11	DDNYID	768.304	767.297	6
366	F8-11	SGGLSL	575.304	574.296	6
367	F8-11	MVVFTT	739.362	738.362	6
368	F8-11	RPADEL	716.358	715.35	6
369	F8-11	NELLTT	732.377	731.37	6
370	F8-11	RSAALE	688.366	687.355	6
371	F8-11	KASPPT	642.346	641.338	6
372	F8-11	FVEWPR	424.231	846.439	6
373	F8-11	FAEAEE	711.283	710.276	6
374	F8-11	WWVM	635.304	634.294	4
375	F8-11	WELDTR	835.394	834.387	6
376	F8-11	RRSE	589.299	588.298	4	P41870;Q9NDE8;P31319;
377	F8-11	SGGLDL	603.299	602.291	6
378	F8-11	QFESQL	793.376	792.365	6
379	F8-11	FZQG	875.445	874.431	4
380	F8-11	MKLSGE	680.326	679.321	6
381	F8-11	LGGGKP	570.324	569.317	6	B3A0P1;
382	F8-11	IAGADIET	805.394	804.387	8	P24733;
383	F8-11	FTMD	513.201	512.194	4	P0DN64;
384	F8-11	LSSSLT	649.342	648.333	6
385	F8-11	EFVN	550.251	549.243	4	P81431;P21901;P02211;P02210;
386	F8-11	LDGL	417.234	416.227	4	P43689;P42636;O97192;O77003;P51537;
387	F8-11	QEKLTE	789.399	788.392	6
388	F8-11	WNELEN	820.349	819.34	6
389	F8-11	LQGAVP	598.356	597.349	6
390	F8-11	RDWDDL	861.375	860.366	6
391	F8-11	FGDELN	708.32	707.313	6
392	F8-11	ELENPL	714.365	713.36	6
393	F8-11	RMTL	562.309	561.294	4	D0PX84;D0PX86;D0PX85;A0A125S9E5;A0A125S9E4;
394	F8-11	FVGDQT	666.309	665.302	6
395	F8-11	RDLDLT	774.399	773.392	6
396	F8-11	FEPGSF	725.319	724.307	6
397	F8-11	RAQSWQ	817.404	816.388	6
398	F8-11	KDDMPT	748.317	747.311	6
399	F8-11	FZDO	944.44	943.441	4
400	F8-11	FSFRGH	766.365	765.356	6
401	F8-11	MPKSPE	704.328	703.321	6
402	F8-11	KVPT	486.292	485.285	4	H2A0M3;Q01821;
403	F8-11	DSRYAE	782.338	781.324	6
404	F8-11	QVPL	472.276	471.269	4	P48891;P0C255;P41823;
405	F8-11	KGGL	416.25	415.243	4	P86860;
406	F8-11	LADDEM	709.269	708.264	6
407	F8-11	QVPYWD	849.381	848.37	6
408	F8-11	FDPEAE	721.303	720.297	6
409	F8-11	ENELLT	734.358	733.349	6
410	F8-11	KPSI	460.276	459.269	4	B3A0P1;C7G0B5;
411	F8-11	RGDNIL	703.367	702.366	6
412	F8-11	RSGMDL	720.343	719.327	6
413	F8-11	WGTWDM	837.332	836.316	6
414	F8-11	WPLEMK	817.43	816.42	6
415	F8-11	MSSLEM	711.31	710.298	6
416	F8-11	RRSH	571.309	570.299	4	P26591;
417	F8-11	FVGAPE	635.305	634.296	6
418	F8-11	EOLGLR	742.409	741.402	6
419	F8-11	FSEPVT	721.349	720.333	6
420	F8-11	SVGL	417.234	416.227	4	A3RLT6;Q25011;Q00229;
421	F8-11	NGNYMR	796.335	795.333	6
422	F8-11	RSADQE	721.304	720.304	6
423	F8-11	LDSL	489.256	488.248	4	Q8ISH7;
424	F8-11	FPPTSQ	692.325	691.318	6
425	F8-11	WRDCVP	789.377	788.364	6
426	F8-11	FVTAGE	623.305	622.296	6
427	F8-11	HGGMIT	631.293	630.28	6
428	F8-11	RMNVPL	743.429	742.416	6
429	F8-11	LGADDL	619.293	618.286	6
430	F8-11	ELTA	475.24	474.233	4	P05963;P02613;P86725;P04113;O96064;
431	F8-11	KVPQ	513.303	512.296	4	B3A0P2;P51537;Q01966;
432	F8-11	ENLSVD	690.33	689.323	6
433	F8-11	LGGGPL	513.303	512.296	6
434	F8-11	ELNNGL	659.334	658.329	6
435	F8-11	FVGSSQ	666.31	665.302	6
436	F8-11	WTET	550.251	549.243	4	P13952;
437	F8-11	RAAGSL	616.331	615.334	6
438	F8-11	ETGLME	693.307	692.305	6
439	F8-11	MPVW	532.267	531.252	4
440	F8-11	KMVT	520.277	519.273	4
441	F8-11	LSGSDL	633.31	632.302	6
442	F8-11	EAAASL	575.304	574.296	6
443	F8-11	RRCL	589.32	588.317	4	Q25410;P01360;P11925;P0C608;H2A0N1;
444	F8-11	QYPT	550.252	549.243	4
445	F8-11	RKMO	589.32	588.305	4
446	F8-11	KLPN	513.303	512.296	4	P35394;
447	F8-11	WIHK	599.34	598.323	4
448	F8-11	LGGDVP	571.309	570.301	6
449	F8-11	WHGH	550.251	549.245	4	A1X159;C0J7L8;A1X158;
450	F8-11	MAPOAH	655.293	654.279	6
451	F8-11	TAASDL	619.293	618.286	6
452	F8-11	SGGLTI	589.318	588.312	6
453	F8-11	YDPL	521.261	520.253	4	Q10584;Q10583;O61363;P12659;P86985;
454	F8-11	FNTV	494.261	493.254	4
455	F8-11	KPGL	456.282	455.274	4	P86730;P84811;P49193;P0CC13;P56710;
456	F8-11	NWDDMEK	937.372	936.365	7	Q964D9;P92179;Q964E1;Q964E2;Q964E0;
457	F8-11	YPIEH	336.671	671.328	5	Q964D9;P92179;Q964E1;Q964E2;Q964E0;
458	F8-11	YTZTT	505.248	1008.49	5
459	F8-11	FGETR	326.162	650.302	5
460	F8-11	HGCZD	955.399	954.399	5
461	F8-11	FNDDP	621.252	620.244	5
462	F8-11	FFFGR	715.362	714.349	5
463	F8-11	FPNMW	736.322	735.305	5
464	F8-11	FLRSP	317.191	632.365	5
465	F8-11	LSIPQ	573.324	572.317	5	O61363;
466	F8-11	KQSPE	630.31	629.302	5
467	F8-11	SLSLQ	589.32	588.312	5
468	F8-11	RLSCH	631.293	630.291	5
469	F8-11	KDLEN	632.325	631.318	5	A9ZPC9;
470	F8-11	RLCVH	641.362	640.348	5
471	F8-11	ESHPK	611.317	610.307	5
472	F8-11	KDDFD	655.258	654.25	5
473	F8-11	QTICL	593.293	592.289	5
474	F8-11	RDAPE	601.302	600.287	5
475	F8-11	WGQRA	617.314	616.308	5
476	F8-11	INSZC	480.73	959.451	5
477	F8-11	WDDEM	711.229	710.222	5
478	F8-11	FGISS	526.253	525.243	5
479	F8-11	KAPPQ	582.326	581.317	5
480	F8-11	EAAVL	518.283	517.275	5
481	F8-11	SGLVT	518.282	517.275	5
482	F8-11	FDPLK	318.173	634.333	5
483	F8-11	FEAAA	550.253	549.243	5	P83631;O47475;
484	F8-11	SKLTE	619.33	618.322	5	P91889;
485	F8-11	RTLQE	688.369	687.355	5
486	F8-11	KAKPQ	613.367	612.36	5
487	F8-11	FTKDA	623.304	622.296	5
488	F8-11	WYPPC	681.273	680.263	5
489	F8-11	EMESC	640.196	639.188	5
490	F8-11	VTALE	574.309	573.301	5
491	F8-11	WNWFQ	794.372	793.355	5
492	F8-11	FEDAA	594.242	593.233	5
493	F8-11	ELEMR	719.33	718.332	5
494	F8-11	SSVDL	562.272	561.265	5
495	F8-11	FGDPT	578.249	577.238	5
496	F8-11	FLVLY	670.376	669.374	5
497	F8-11	LVVSH	570.325	569.317	5
498	F8-11	FVAPE	578.283	577.275	5	P83425;
499	F8-11	LMSKE	623.304	622.3	5
500	F8-11	SSYDI	626.266	625.26	5
501	F8-11	LDGDL	532.262	531.254	5	C7G0B5;
502	F8-11	FVIVP	616.366	615.363	5
503	F8-11	RVMAH	629.313	628.312	5
504	F8-11	RATMP	589.32	588.305	5
505	F8-11	RSAEA	575.285	574.271	5
506	F8-11	KMLAF	326.177	650.346	5
507	F8-11	LSSDV	562.272	561.265	5
508	F8-11	LGAML	520.276	519.273	5
509	F8-11	LGGVP	456.282	455.274	5	Q967R6;
510	F8-11	FEVDA	596.257	595.249	5
511	F8-11	RLGGE	547.288	546.276	5
512	F8-11	WVTAH	629.312	628.297	5
513	F8-11	QYKHQ	745.371	744.355	5
514	F8-11	FPGMR	621.325	620.31	5
515	F8-11	FPLSR	331.187	660.36	5
516	F8-11	RYPFF	743.396	742.38	5
517	F8-11	MTHWK	718.325	717.327	5
518	F8-11	RVCVH	629.313	628.312	5
519	F8-11	WVNQF	707.36	706.344	5
520	F8-11	FPSDL	594.276	593.27	5
521	F8-11	QVDVK	630.346	629.338	5
522	F8-11	RWFLH	800.416	799.413	5
523	F8-11	WPDKR	743.392	742.376	5
524	F8-11	LASDL	560.293	559.285	5
525	F8-11	MMLCL	626.266	625.264	5
526	F8-11	RWPPT	656.361	655.344	5
527	F8-11	WRDPV	686.371	685.355	5
528	F8-11	TPSPL	530.282	529.275	5
529	F8-11	QSMLM	623.288	622.282	5
530	F8-11	DDDEL	620.242	619.234	5
531	F8-11	FQQQH	701.332	700.329	5	Q3L1C9;
532	F8-11	FGPDL	562.289	561.28	5
533	F8-11	ROQRN	728.381	727.372	5
534	F8-11	KLASE	589.321	588.312	5
535	F8-11	FPLES	608.293	607.285	5
536	F8-11	QPMLR	686.373	685.358	5
537	F8-11	RAEWW	789.358	788.361	5
538	F8-11	LAAGL	460.277	459.269	5	P22975;
539	F8-11	VGRCL	589.321	588.305	5
540	F8-11	YSDVP	594.276	593.27	5	P15513;
541	F8-11	RATEA	589.299	588.287	5	Q9GZ70;Q9GZ69;Q25457;Q9GZ71;Q95WY0;
542	F8-11	QVMVM	623.288	622.282	5
543	F8-11	FGGRS	565.264	564.266	5
544	F8-11	FMGQR	680.324	679.311	5
545	F8-11	WGNVR	673.34	672.334	5
546	F8-11	SGLTI	532.299	531.29	5
547	F8-11	RAGFP	589.319	588.302	5
548	F8-11	EVDAL	560.293	559.285	5
549	F8-11	YDIAA	594.277	593.27	5
550	F8-11	ENFQI	666.309	665.302	5
551	F8-11	MVTAW	623.288	622.278	5
552	F8-11	RSWDO	690.33	689.313	5
553	F8-11	FVTSQ	623.305	622.296	5
554	F8-11	EVQAL	575.305	574.296	5
555	F8-11	EDAVL	560.293	559.285	5
556	F8-11	LADDL	560.292	559.285	5
557	F8-11	FIDWPR	424.224	846.439	6
558	F8-11	FDDNPS	708.287	707.276	6
559	F8-11	LOWMHT	842.39	841.379	6
560	F8-11	EPEFNE	780.304	779.297	6
561	F8-11	EVZ	771.398	770.394	3
562	F8-11	KDDYNE	825.325	824.319	6
563	F8-11	FADDVH	359.164	716.313	6
564	F8-11	RWSGSH	743.357	742.351	6
565	F8-11	MPZ	771.387	770.376	3
566	F8-11	LAGPPQ	598.319	597.312	6
567	F8-11	LSAMPR	345.687	689.353	6
568	F8-11	EWRNSN	847.379	846.362	6
569	F8-11	QVNTQP	728.358	727.35	6
570	F8-11	PGMRSE	718.325	717.312	6
571	F8-11	MAAAVH	615.3	614.285	6
572	F8-11	ETYKDL	768.377	767.37	6
573	F8-11	SNPAER	715.328	714.33	6
574	F8-11	EEAFDE	753.292	752.286	6
575	F8-11	EVDGVD	647.288	646.281	6
576	F8-11	DDMNYD	786.261	785.254	6
577	F8-11	KVLAAE	672.393	671.385	6
578	F8-11	LAADLQ	646.34	645.333	6
579	F8-11	KZE	400.719	799.42	3
580	F8-11	ENPLAS	672.318	671.313	6
581	F8-11	FHGWLN	815.393	814.376	6
582	F8-11	NKLGGA	601.33	600.323	6
583	F8-11	EASFPS	651.297	650.291	6
584	F8-11	FEAEQN	751.326	750.318	6
585	F8-11	SGGVLT	575.305	574.296	6
586	F8-11	KPWNGN	731.353	730.34	6
587	F8-11	YQEVDA	740.309	739.302	6
588	F8-11	LGPQPQ	681.356	680.349	6
589	F8-11	FGFGLV	653.362	652.358	6
590	F8-11	EREAPS	702.345	701.334	6
591	F8-11	TSVDAE	663.283	662.276	6
592	F8-11	WPADRL	773.396	772.387	6
593	F8-11	DSRGTE	678.31	677.298	6
594	F8-11	FCPTWA	740.311	739.3	6
595	F8-11	QFEDEA	752.309	751.302	6
596	F8-11	QSLSVD	662.335	661.328	6
597	F8-11	EPKLEQ	785.405	784.397	6
598	F8-11	KASPPQ	669.355	668.349	6
599	F8-11	RALSYT	726.378	725.371	6
600	F8-11	NGSFTV	638.315	637.307	6
601	F8-11	DDSLSL	663.319	662.312	6
602	F8-11	EDKRPE	789.379	788.366	6
603	F8-11	EELRSE	804.373	803.366	6
604	F8-11	EGPSYN	682.269	681.261	6
605	F8-11	NGLVGD	588.299	587.291	6
606	F8-11	EZE	801.37	800.368	3
607	F8-11	FESWSW	883.368	882.355	6
608	F8-11	FMDQWS	855.337	854.327	6
609	F8-11	GFGGNN	581.238	580.224	6
610	F8-11	DGDPLQ	658.305	657.297	6
611	F8-11	FMQLER	433.219	864.416	6
612	F8-11	EVCLPT	703.327	702.326	6
613	F8-11	WGNMER	808.34	807.333	6
614	F8-11	EGYPPT	679.295	678.286	6
615	F8-11	FVNNGN	706.325	705.308	6
616	F8-11	HGMVLF	703.362	702.352	6
617	F8-11	WLGDPE	730.335	729.333	6
618	F8-11	KDPEPE	756.34	755.334	6
619	F8-11	SGGYID	653.278	652.27	6
620	F8-11	HSWYFS	842.341	841.339	6
621	F8-11	FPSYQL	768.386	767.385	6
622	F8-11	EVDLEN	732.338	731.334	6
623	F8-11	FLHEDR	832.385	831.388	6
624	F8-11	EASPEL	687.319	686.312	6
625	F8-11	RMGDQP	717.341	716.328	6
626	F8-11	FDELEN	782.319	781.313	6
627	F8-11	SAPSLG	573.288	572.281	6
628	F8-11	RSEWDN	820.352	819.351	6
629	F8-11	KCSGVG	564.279	563.274	6
630	F8-11	QGYGGP	592.265	591.265	6
631	F8-11	EYDVER	852.367	851.366	6
632	F8-11	QGYSVD	710.3	709.292	6
633	F8-11	FSTFVG	671.336	670.333	6
634	F8-11	FGWDWK	838.395	837.381	6
635	F8-11	LGGDVF	623.305	622.296	6
636	F8-11	FFFLLG	757.42	756.421	6
637	F8-11	HGGYWD	748.299	747.298	6
638	F8-11	RATPGW	701.382	700.366	6
639	F8-11	FGRROM	411.211	820.401	6
640	F8-11	LGDQPV	642.347	641.338	6
641	F8-11	FCYHVQ	838.356	837.348	6
642	F8-11	SGAFDE	667.257	666.25	6
643	F8-11	HEMPPT	727.315	726.301	6
644	F8-11	LSAAAP	543.314	542.306	6
645	F8-11	ZCK	758.394	757.392	3
646	F8-11	EASKDD	706.288	705.282	6
647	F8-11	FQVDTD	740.31	739.302	6
648	F8-11	FSFLTA	701.346	700.343	6
649	F8-11	KEPNPE	755.356	754.35	6
650	F8-11	ENLATT	690.329	689.323	6
651	F8-11	RPETSP	728.357	727.35	6
652	F8-11	QSPPPT	640.331	639.323	6
653	F8-11	FDADLG	653.278	652.27	6
654	F8-11	AAAQFE	652.295	651.286	6
655	F8-11	YVREER	434.218	866.425	6
656	F8-11	RCLHLF	830.432	829.427	6
657	F8-11	LGKNPN	684.366	683.36	6
658	F8-11	ENESWW	892.353	891.34	6
659	F8-11	RNCWDD	824.295	823.292	6
660	F8-11	VTPYPP	715.364	714.359	6
661	F8-11	WRVWPQ	913.474	912.461	6
662	F8-11	QPEMQD	763.292	762.285	6
663	F8-11	EVDLMD	737.297	736.295	6
664	F8-11	HGHRPQ	745.386	744.378	6
665	F8-11	DNGLDL	660.319	659.313	6
666	F8-11	QMRDGM	779.324	778.31	6
667	F8-11	KNCRPK	787.422	786.417	6
668	F8-11	SDGDLM	679.261	678.253	6
669	F8-11	LTAEQE	704.347	703.339	6
670	F8-11	KPSDDV	702.33	701.323	6
671	F8-11	QLTADD	676.315	675.308	6
672	F8-11	RGSYPP	718.361	717.345	6
673	F8-11	NGSRNA	634.287	633.283	6
674	F8-11	RACQLD	747.351	746.338	6
675	F8-11	TSYFTF	807.353	806.349	6
676	F8-11	SGGSRL	618.311	617.313	6
677	F8-11	YYSDDL	817.323	816.318	6
678	F8-11	LAPSYE	721.347	720.333	6
679	F8-11	SGGLLT	589.32	588.312	6	Q76CA2;
680	F8-11	RPSYCN	781.336	780.322	6
681	F8-11	EICRPQ	787.382	786.369	6
682	F8-11	APKLPR	362.229	722.444	6
683	F8-11	FIRRPO	817.467	816.461	6
684	F8-11	LPVGGP	553.335	552.327	6
685	F8-11	KDNGNN	677.292	676.278	6
686	F8-11	EETADL	693.287	692.286	6
687	F8-11	FCDDRA	740.31	739.296	6
688	F8-11	HDFDDM	779.266	778.259	6
689	F8-11	EKELEN	803.377	802.371	6
690	F8-11	RMMSGN	711.282	710.284	6
691	F8-11	WCDPFD	824.293	823.285	6
692	F8-11	VTYPPM	721.352	720.352	6
693	F8-11	SSGLGL	575.305	574.296	6
694	F8-11	FFQPSE	796.357	795.344	6
695	F8-11	ENLSTR	735.367	734.356	6
696	F8-11	SVAALE	631.33	630.322	6
697	F8-11	WSZ	816.41	815.394	3
698	F8-11	NGNLLT	645.358	644.349	6
699	F8-11	FCHLYS	811.348	810.337	6
700	F8-11	QKLNPN	755.404	754.397	6
701	F8-11	ETWTTR	835.394	834.387	6
702	F8-11	KDDACL	680.293	679.285	6
703	F8-11	KDGDLE	690.33	689.323	6
704	F8-11	EITVVH	739.396	738.391	6
705	F8-11	LDVWPR	414.225	826.434	6
706	F8-11	NVCQLD	705.319	704.316	6
707	F8-11	QPAQLN	684.368	683.36	6
708	F8-11	KNSDDD	709.266	708.256	6
709	F8-11	LAGAEF	623.304	622.296	6
710	F8-11	YFLVVS	743.397	742.39	6
711	F8-11	KVYPPS	706.377	705.37	6
712	F8-11	MQMELE	796.32	795.314	6
713	F8-11	RDAQLT	717.38	716.382	6
714	F8-11	QTYPPT	722.336	721.328	6
715	F8-11	RGDNGR	674.336	673.326	6
716	F8-11	SGTTAW	664.296	663.286	6
717	F8-11	WGWIDW	878.373	877.376	6
718	F8-11	KMPWPV	799.423	798.41	6
719	F8-11	EVCRMR	835.395	834.384	6
720	F8-11	EGGVVQ	630.31	629.302	6
721	F8-11	ENMFTE	784.32	783.311	6
722	F8-11	WGISEW	819.376	818.36	6
723	F8-11	QGYPPQ	705.32	704.313	6	P24603;Q17094;P09241;P31356;O16005;
724	F8-11	EKQLED	803.377	802.371	6
725	F8-11	FMVTPE	737.35	736.347	6
726	F8-11	DNILLG	686.371	685.365	6
727	F8-11	RMTAWT	765.378	764.364	6
728	F8-11	FEEDED	825.269	824.271	6
729	F8-11	KPCQOR	786.398	785.385	6
730	F8-11	KPSVDE	690.329	689.323	6
731	F8-11	ESEFLT	739.361	738.344	6
732	F8-11	RFWQAH	844.415	843.414	6
733	F8-11	QLDGDP	658.304	657.297	6
734	F8-11	RELENE	803.382	802.382	6
735	F8-11	EKEKDL	803.415	802.407	6
736	F8-11	KDDFNT	781.338	780.329	6
737	F8-11	FDADRV	764.348	763.35	6
738	F8-11	EWWKPT	862.415	861.402	6
739	F8-11	LTCVVD	665.315	664.31	6
740	F8-11	ETNLFD	754.325	753.318	6
741	F8-11	WPRCQL	818.404	817.39	6
742	F8-11	FEEEDD	825.269	824.271	6
743	F8-11	DSYANV	710.299	709.292	6
744	F8-11	YPSTQS	724.314	723.308	6
745	F8-11	LTADLE	677.334	676.328	6
746	F8-11	RGCWLP	745.374	744.374	6
747	F8-11	NGLGGL	544.31	543.302	6
748	F8-11	RSTAER	735.367	734.367	6
749	F8-11	WWEPRS	874.413	873.413	6
750	F8-11	EFCRVD	810.348	809.338	6
751	F8-11	EGPFLN	692.324	691.318	6
752	F8-11	FDPLQE	764.348	763.339	6
753	F8-11	EDLEEV	775.346	774.328	6
754	F8-11	LGGSDL	575.304	574.296	6
755	F8-11	DGRNLE	717.345	716.345	6
756	F8-11	EAMRMR	835.394	834.384	6
757	F8-11	RYPPPN	743.393	742.376	6
758	F8-11	DAVLDN	660.32	659.313	6
759	F8-11	FGWTAH	732.337	731.339	6
760	F8-11	EVDVPT	673.34	672.333	6
761	F8-11	YDDHME	825.27	824.265	6
762	F8-11	RMQDLT	805.393	804.38	6
763	F8-11	YPTSAP	677.313	676.307	6
764	F8-11	SGGRNL	645.322	644.324	6
765	F8-11	KDPFSE	738.329	737.323	6
766	F8-11	LGGSLE	589.32	588.312	6	P83040;
767	F8-11	FGCSRG	668.289	667.275	6
768	F8-11	ENLLVG	686.371	685.365	6
769	F8-11	ELCQLD	736.317	735.311	6
770	F8-11	VAPACL	589.3	588.294	6
771	F8-11	YYDDFM	869.3	868.295	6
772	F8-11	EVDIPS	673.34	672.333	6
773	F8-11	EKEKTE	805.398	804.387	6
774	F8-11	LGGDQL	616.331	615.323	6
775	F8-11	YPPGLS	649.319	648.312	6
776	F8-11	LAALEE	661.343	660.333	6
777	F8-11	LSL	332.217	331.211	3	Q8WEW4;Q10583;Q00232;P0DKP4;P86962;
778	F8-11	LGGELE	633.309	632.302	6	Q10584;P12031;
779	F8-11	ELENLS	746.365	745.349	6
780	F8-11	SVDVPV	657.343	656.338	6
781	F8-11	EVDAIQ	688.348	687.344	6
782	F8-11	EASADL	619.293	618.286	6
783	F8-11	FNWQPA	804.36	803.36	6
784	F8-11	TTPKPT	686.372	685.365	6
785	F8-11	FPWIPN	787.421	786.406	6
786	F8-11	EVNYLN	793.374	792.365	6
787	F8-11	ENVIVA	644.362	643.354	6
788	F8-11	WGVMVM	736.36	735.345	6
789	F8-11	SSLPLT	659.362	658.354	6
790	F8-11	WGSFWQ	824.377	823.365	6
791	F8-11	MPOWPL	772.368	771.362	6
792	F8-11	MAERMR	835.394	834.384	6
793	F8-11	FVWCPP	764.348	763.336	6
794	F8-11	DPF	378.166	377.159	3	P42565;Q07981;H2A0P1;H2A0M0;P12659;
795	F8-11	WWL	546.277	545.264	3	A3RLT6;Q6IWZ0;Q5WA50;P35903;Q17043;
796	F8-11	WCGSPL	704.309	703.3	6
797	F8-11	EGGAVL	559.31	558.301	6
798	F8-11	STICLN	692.325	691.321	6
799	F8-11	EGPFLL	717.38	716.374	6
800	F8-11	TCMMAW	784.281	783.275	6
801	F8-11	EKENPL	743.393	742.386	6
802	F8-11	WRNDPL	816.404	815.393	6
803	F8-11	WVQ	474.238	473.227	3	B0KZ79;H2A0L6;H2A0L4;P86956;P35003;
804	F8-11	FGRCKH	789.374	788.375	6
805	F8-11	SDGLPL	643.329	642.322	6
806	F8-11	WSEWMT	855.333	854.327	6
807	F8-11	WZD	828.41	827.394	3
808	F8-11	DLTCVE	693.305	692.305	6
809	F8-11	RSEQNS	734.336	733.335	6
810	F8-11	WUVVDL	796.319	795.307	6
811	F8-11	KFO	449.242	448.232	3
812	F8-11	LDDELR	802.394	801.387	6
813	F8-11	FDLSVG	653.314	652.307	6
814	F8-11	ENVPLT	686.371	685.365	6
815	F8-11	LTCSTQ	666.31	665.305	6
816	F8-11	RSNAVL	701.384	700.387	6
817	F8-11	EAKNSL	677.353	676.339	6
818	F8-11	TSALME	693.305	692.305	6
819	F8-11	QTLWDN	790.374	789.366	6
820	F8-11	FLTDQP	734.37	733.365	6
821	F8-11	TEMKDW	851.356	850.353	6
822	F8-11	EEEIVR	816.41	815.403	6
823	F8-11	WTELEQ	821.367	820.36	6
824	F8-11	ETNLPL	702.365	701.36	6
825	F8-11	WLMSMP	806.356	805.35	6
826	F8-11	LGGFQE	666.309	665.302	6
827	F8-11	NVRGIW	786.436	785.418	6
828	F8-11	RASDNE	705.312	704.309	6
829	F8-11	EASLPL	643.366	642.359	6
830	F8-11	RTVMAH	730.359	729.359	6
831	F8-11	SGGALR	602.316	601.318	6
832	F8-11	NGLMDV	690.305	689.305	6
833	F8-11	WELEEL	832.404	831.401	6
834	F8-11	QVDEPL	714.368	713.36	6
835	F8-11	LDDVPT	673.339	672.333	6
836	F8-11	FCZ	793.374	792.36	3
837	F8-11	LSGGQV	602.316	601.307	6
838	F8-11	MRLEVT	790.416	789.405	6
839	F8-11	MPKANE	705.318	704.316	6
840	F8-11	KDWDPL	789.372	788.37	6
841	F8-11	QLENPL	729.379	728.37	6
842	F8-11	DLIAPE	673.34	672.333	6
843	F8-11	ETTRSE	738.334	737.319	6
844	F8-11	FVGGTT	623.305	622.296	6
845	F8-11	RGGAEL	616.331	615.334	6
846	F8-11	EVCRCL	738.33	737.32	6
847	F8-11	ETRIPQ	759.404	758.392	6
848	F8-11	STQALE	690.332	689.323	6
849	F8-11	NMREGM	779.322	778.31	6
850	F8-11	HGHWTR	835.395	834.389	6
851	F8-11	QGYGDL	666.309	665.302	6
852	F8-11	SGGLLN	602.315	601.307	6
853	F8-11	MPAGLR	686.374	685.358	6
854	F8-11	EGGVVL	589.318	588.312	6
855	F8-11	SGGLQL	616.331	615.323	6
856	F8-11	WASPMA	704.309	703.3	6
857	F8-11	FGGGLM	623.289	622.278	6
858	F8-11	WPW	530.247	529.233	3
859	F8-11	EDISADQ	777.326	776.319	7	A0A125S9E6;
860	F8-11	EDEAAVT	748.331	747.329	7	Q06BR2;
861	F8-11	RAAEDSK	818.391	817.393	7	P0DN54;
862	F8-11	RPADVPV	769.416	768.413	7	P19448;Q01381;P04552;
863	F8-11	ELEEELE	890.397	889.392	7	P24733;
864	F8-11	SLETLNT	819.413	818.402	7	P30841;
865	F8-11	KZVH	454.255	906.505	4
866	F8-11	QWGF	579.261	578.249	4
867	F8-11	KNWH	626.314	625.297	4	P86854;
868	F8-11	QEHW	615.245	614.245	4	P0C668;
869	F8-11	EYZN	949.437	948.431	4
870	F8-11	EYZS	922.426	921.421	4
871	F8-11	ESZI	870.466	869.462	4
872	F8-11	ZFPK	457.263	912.519	4
873	F8-11	MZPQ	899.447	898.434	4
874	F8-11	KNSW	576.287	575.27	4
875	F8-11	MIMR	564.303	563.292	4	D0PX84;D0PX86;D0PX85;A0A125S9E5;A0A125S9E4;
876	F8-11	WWPQ	658.305	657.291	4
877	F8-11	EMZS	890.407	889.398	4
878	F8-11	LNEL	502.287	501.28	4	Q05976;P14528;B3A0P3;
879	F8-11	WQFO	609.268	608.259	4
880	F8-11	VPLT	443.286	442.279	4	O76997;Q7YT83;Q3YEH6;C0KYC5;P04962;
881	F8-11	LPLS	471.282	470.274	4	P48884;P0CE32;P0CE27;C3VVN5;P0CE25;
882	F8-11	LENL	502.288	501.28	4	O61471;H2A0N6;Q9GZ70;Q9XZL0;Q9U655;
883	F8-11	DTVF	495.245	494.238	4	Q16951;
884	F8-11	VALE	445.266	444.258	4	P46088;
885	F8-11	SVDP	459.209	458.201	4	P58154;Q76CA2;
886	F8-11	YKOT	566.283	565.275	4
887	F8-11	YRHQ	603.297	602.292	4
888	F8-11	EVVL	475.276	474.269	4	Q9BPH3;Q00568;P48907;
889	F8-11	LSLE	503.271	502.264	4	H2A0M4;Q8WTN9;Q01240;Q01241;Q16974;
890	F8-11	KGVP	442.266	441.259	4	O02654;P86859;
891	F8-11	RDEL	548.275	547.26	4	P0CH17;P0C850;Q16981;Q3YLA4;P46825;
892	F8-11	QPAE	486.22	485.212	4	H2BKS9;A0A2I6EDM8;A0A2I6EDN3;Q9BP55;A0A2I6EDL5;
893	F8-11	SLSL	461.26	460.253	4	O97374;Q8WEW4;Q9TGE6;Q00945;Q967R6;
894	F8-11	SDLI	489.256	488.248	4	O15973;Q9BP46;P0DM23;P50985;Q9BPE3;
895	F8-11	EIDW	576.267	575.259	4
896	F8-11	FPPT	477.234	476.227	4	O15990;
897	F8-11	WWWV	718.325	717.327	4
898	F8-11	LNPM	474.238	473.231	4	P0C1W7;
899	F8-11	LSVM	463.258	462.251	4	Q2I2R5;O47477;Q05973;
900	F8-11	LDPV	457.265	456.258	4	H2A0L2;P26591;Q10584;
901	F8-11	QVPK	513.303	512.296	4
902	F8-11	QFEV	536.272	535.264	4	O61363;Q10583;Q10584;P12659;A0A0G2UGT2;
903	F8-11	WSEL	576.267	575.259	4
904	F8-11	WDRW	704.309	703.308	4
905	F8-11	TODI	475.24	474.233	4
906	F8-11	ZLRT	305.177	912.515	4
907	F8-11	QPVL	470.298	469.29	4
908	F8-11	KTMV	494.261	493.257	4	P0DKQ8;Q05973;
909	F8-11	QALP	442.266	441.259	4	Q9BPA6;Q9BHB7;
910	F8-11	WEPR	629.314	628.297	4
911	F8-11	EVFN	550.252	549.243	4	O97374;Q4KTY1;
912	F8-11	FMPR	564.303	563.289	4
913	F8-11	FOPF	565.264	564.258	4
914	F8-11	WFTW	653.314	652.301	4
915	F8-11	SLQL	502.287	501.28	4
916	F8-11	DVDL	475.24	474.233	4	Q8WR62;B3A0Q7;
917	F8-11	ESWWE	750.314	749.302	5	Q9BPC8;P0C834;Q9BPC1;Q3YEF9;Q9BPC5;
918	F8-11	KPVPR	319.703	637.391	5
919	F8-11	ETYPT	652.292	651.275	5	Q8WR62;
920	F8-11	DMAPR	631.292	630.28	5
921	F8-11	FKGPR	302.678	603.349	5
922	F8-11	KRRSN	702.404	701.393	5
923	F8-11	QMGYW	726.295	725.284	5
924	F8-11	YFLLT	672.357	671.353	5
925	F8-11	ELEPH	640.294	639.286	5
926	F8-11	WNPNN	658.304	657.287	5
927	F8-11	QLQPA	598.319	597.312	5
928	F8-11	TKDVC	581.257	580.253	5
929	F8-11	LDQPS	575.267	574.26	5
930	F8-11	SGMRR	648.32	647.317	5
931	F8-11	EVDLM	622.276	621.268	5
932	F8-11	EASSR	565.261	564.25	5
933	F8-11	PRVVP	291.193	580.37	5	Q8ISH7;
934	F8-11	LFPLS	618.346	617.342	5	A0A2I6EDM8;Q9BPH3;A0A2I6EDM1;A0A2I6EDM5;A0A2I6EDN1;
935	F8-11	LGPPT	526.288	525.28	5
936	F8-11	LCCVV	552.252	551.245	5
937	F8-11	LDDFE	654.259	653.254	5
938	F8-11	LAVLD	546.315	545.306	5
939	F8-11	ZLGTT	457.261	912.504	5
940	F8-11	VSFTT	596.296	595.285	5
941	F8-11	SLSLD	576.288	575.28	5	Q10584;
942	F8-11	VAPWT	589.299	588.291	5
943	F8-11	LKLGP	271.19	540.364	5
944	F8-11	FWWPK	390.2	778.38	5
945	F8-11	FVTSK	312.173	622.333	5
946	F8-11	QPAPL	539.319	538.311	5
947	F8-11	DRALT	589.321	588.323	5
948	F8-11	LTCED	594.241	593.237	5
949	F8-11	SVDLE	604.28	603.275	5
950	F8-11	EYQLD	683.292	682.281	5
951	F8-11	QMGFR	680.327	679.311	5
952	F8-11	EVDLE	618.296	617.291	5	Q9GZ70;Q9GZ69;Q25457;Q9GZ71;A7UMC0;
953	F8-11	SLSGL	518.283	517.275	5	P48902;P0DN62;
954	F8-11	NGYID	595.273	594.265	5
955	F8-11	QGFNC	582.224	581.227	5
956	F8-11	LLDNP	585.325	584.317	5
957	F8-11	QLENL	630.346	629.338	5	P12031;
958	F8-11	EMEKM	683.271	682.267	5	Q01240;Q01241;
959	F8-11	PSYGK	593.293	592.286	5
960	F8-11	EGFLT	582.277	581.27	5
961	F8-11	TAHPK	567.326	566.318	5
962	F8-11	EAKFD	623.303	622.296	5
963	F8-11	PSVLT	558.313	557.306	5
964	F8-11	ELENL	617.313	616.307	5	Q9BH84;O61471;
965	F8-11	EADLM	592.265	591.257	5
966	F8-11	QNPFH	658.304	657.287	5
967	F8-11	VKVPL	278.197	554.379	5
968	F8-11	MPLAR	603.335	602.321	5
969	F8-11	LNDVP	571.309	570.301	5
970	F8-11	WPFPR	372.696	743.376	5
971	F8-11	VPIGP	496.314	495.306	5
972	F8-11	LSGVV	488.308	487.301	5
973	F8-11	WTWKH	773.366	772.366	5
974	F8-11	LAGFD	538.251	537.243	5
975	F8-11	ESSSR	607.273	606.261	5
976	F8-11	LSSYD	626.266	625.26	5
977	F8-11	VDQPI	585.324	584.317	5
978	F8-11	TALYF	630.307	629.306	5
979	F8-11	ERWWT	819.373	818.371	5
980	F8-11	YPPPE	618.282	617.27	5
981	F8-11	SSALL	532.298	531.29	5	Q25461;
982	F8-11	QTAWI	634.318	633.312	5
983	F8-11	LSSAL	532.298	531.29	5
984	F8-11	HGFFF	696.316	695.307	5
985	F8-11	QTGPF	565.262	564.254	5
986	F8-11	QMRAH	658.304	657.302	5
987	F8-11	SFTVT	596.294	595.285	5
988	F8-11	EDZWN	1087.49	1086.47	5
989	F8-11	SSFVT	582.278	581.27	5
990	F8-11	QVLLT	589.356	588.348	5
991	F8-11	LNAAL	543.314	542.306	5
992	F8-11	AVSDL	546.278	545.27	5	O15973;O15974;
993	F8-11	EEAVL	574.308	573.301	5	A7UMC0;
994	F8-11	FRPMN	680.325	679.311	5
995	F8-11	LPVPS	526.324	525.316	5	P12659;
996	F8-11	QSKLE	646.342	645.333	5	Q2V0V2;
997	F8-11	HHSQR	680.328	679.315	5
998	F8-11	LDGDF	580.263	579.254	5	Q00676;
999	F8-11	ETICL	594.277	593.273	5
1000	F8-11	LSVAA	502.287	501.28	5
1001	F8-11	LGGKP	513.303	512.296	5	H2A0L4;
1002	F8-11	ESLSL	590.303	589.296	5
1003	F8-11	SGSFL	552.267	551.259	5
1004	F8-11	YSVPE	608.292	607.285	5
1005	F8-11	CRPDL	619.294	618.28	5
1006	F8-11	ENREL	676.336	675.319	5
1007	F8-11	VVNPL	541.335	540.327	5	C0HKM3;
1008	F8-11	LGGPL	456.282	455.274	5	P80960;P56823;
1009	F8-11	SAAVL	502.287	501.28	5	P31319;
1010	F8-11	ETLSL	604.319	603.312	5	P38412;
1011	F8-11	FSPEV	594.276	593.27	5
1012	F8-11	YPPLA	602.316	601.311	5
1013	F8-11	YVAAE	594.277	593.27	5
1014	F8-11	KAVPT	557.33	556.322	5
1015	F8-11	QGQRR	686.374	685.362	5
1016	F8-11	LENPL	599.34	598.333	5	Q25626;P27009;P27014;P27012;P27016;
1017	F8-11	KDDVF	623.307	622.296	5
1018	F8-11	FTOPR	324.182	646.344	5
1019	F8-11	YLAGE	594.278	593.27	5
1020	F8-11	EGVEW	633.289	632.281	5
1021	F8-11	EDAFL	610.272	609.265	5
1022	F8-11	WIGGT	547.288	546.28	5
1023	F8-11	KHFWQ	759.403	758.386	5
1024	F8-11	YTPPT	594.278	593.27	5
1025	F8-11	EGVVL	532.298	531.29	5
1026	F8-11	SGLDL	546.277	545.27	5	B3A0P1;
1027	F8-11	SALGL	502.287	501.28	5
1028	F8-11	QSLSL	589.32	588.312	5
1029	F8-11	SSLQL	589.32	588.312	5
1030	F8-11	WKAPN	629.35	628.333	5
1031	F8-11	ELCFL	666.31	665.309	5
1032	F8-11	FMROO	695.326	694.311	5
1033	F8-11	SVDAL	546.278	545.27	5	Q9BPG0;Q9BPF3;
1034	F8-11	NVAVP	513.303	512.296	5	B3A0Q7;
1035	F8-11	QOWCL	704.311	703.3	5
1036	F8-11	EGYSI	610.272	609.265	5
1037	F8-11	YIDAA	594.278	593.27	5
1038	F8-11	FCDER	711.283	710.269	5
1039	F8-11	TVVPN	571.309	570.301	5
1040	F8-11	QLAAP	513.303	512.296	5
1041	F8-11	QPWML	690.33	689.321	5
1042	F8-11	LDQPV	585.325	584.317	5
1043	F8-11	SVAAL	502.288	501.28	5	Q10998;
1044	F8-11	MLWPQ	690.33	689.321	5
1045	F8-11	NQFEI	666.309	665.302	5	Q05973;
1046	F8-11	WTLEE	693.308	692.302	5
1047	F8-11	ETWPL	659.335	658.333	5
1048	F8-11	RSLCP	589.32	588.305	5
1049	F8-11	YACLPV	707.335	706.336	6
1050	F8-11	RCEGER	791.344	790.339	6
1051	F8-11	EQLEEEQ	904.392	903.382	7	P24733;
1052	F8-11	HFWDKE	875.411	874.397	6
1053	F8-11	EDEVDA	691.278	690.271	6
1054	F8-11	ETGWHE	800.313	799.314	6
1055	F8-11	YIGNNP	691.341	690.334	6
1056	F8-11	HGDTYT	707.299	706.292	6
1057	F8-11	FHSAAP	322.163	642.313	6
1058	F8-11	EASDYE	727.279	726.271	6
1059	F8-11	WGDQPV	717.317	716.313	6
1060	F8-11	KPDKNT	716.394	715.386	6
1061	F8-11	SLQDLE	746.357	745.349	6
1062	F8-11	QPDVFM	778.34	777.337	6
1063	F8-11	ETSSFT	713.298	712.292	6
1064	F8-11	RMQEEA	805.358	804.344	6
1065	F8-11	EDKENQ	804.336	803.33	6
1066	F8-11	KDEAET	734.318	733.313	6
1067	F8-11	EGEKKE	761.368	760.36	6
1068	F8-11	LARKGP	342.214	682.413	6
1069	F8-11	WCIEVS	778.342	777.337	6
1070	F8-11	ENLAIN	687.367	686.36	6
1071	F8-11	FHGWEA	762.313	761.313	6
1072	F8-11	QPGLST	644.326	643.318	6
1073	F8-11	PGCKPW	729.339	728.332	6
1074	F8-11	RSDMPP	702.33	701.317	6
1075	F8-11	FTVAAP	310.175	618.338	6
1076	F8-11	LADDVD	663.282	662.276	6
1077	F8-11	QKEVCW	834.389	833.374	6
1078	F8-11	RSEETV	762.364	761.356	6
1079	F8-11	LSGDELE	804.365	803.355	7	Q25413;
1080	F8-11	ERWEPG	789.362	788.345	6
1081	F8-11	KDGEPQ	715.326	714.318	6
1082	F8-11	KDPWWE	902.411	901.397	6
1083	F8-11	EAPELS	659.325	658.317	6
1084	F8-11	QEDAVL	688.351	687.344	6
1085	F8-11	WCIVES	778.34	777.337	6
1086	F8-11	EPGKCG	632.27	631.264	6
1087	F8-11	WWGMWS	866.363	865.358	6
1088	F8-11	NGNGYE	667.26	666.261	6
1089	F8-11	LVGSPA	585.324	584.317	6
1090	F8-11	KDDDKE	763.35	762.34	6
1091	F8-11	EFTFLT	773.367	772.364	6
1092	F8-11	EENDFM	800.275	799.269	6
1093	F8-11	KAALEE	676.349	675.344	6
1094	F8-11	STPSVS	619.293	618.286	6
1095	F8-11	SGYNVE	710.297	709.292	6	Q00860;
1096	F8-11	WLNPSR	814.428	813.413	6
1097	F8-11	SPACLS	619.269	618.268	6
1098	F8-11	ENLASF	696.321	695.313	6
1099	F8-11	LMDVNN	721.311	720.311	6
1100	F8-11	ESPRMQ	789.361	788.349	6
1101	F8-11	ESCDDR	740.258	739.244	6
1102	F8-11	KFDPDT	736.354	735.344	6
1103	F8-11	EGGTGR	592.265	591.261	6
1104	F8-11	MRFAFN	801.374	800.364	6
1105	F8-11	EGGYSV	653.278	652.27	6
1106	F8-11	MGLGGH	587.27	586.253	6
1107	F8-11	QEWVWS	876.395	875.381	6
1108	F8-11	RCFNEQ	838.358	837.344	6
1109	F8-11	YIDWPR	433.218	864.413	6
1110	F8-11	EERDVD	804.336	803.33	6
1111	F8-11	KPSIET	716.382	715.375	6
1112	F8-11	QHSEFQ	789.362	788.345	6
1113	F8-11	QTPEKE	773.361	772.36	6
1114	F8-11	EVDAAV	619.294	618.286	6
1115	F8-11	EREDLT	776.379	775.371	6
1116	F8-11	ELTADQ	718.318	717.318	6
1117	F8-11	LSMSTD	669.274	668.269	6
1118	F8-11	EEEKFD	812.33	811.324	6
1119	F8-11	LTALPR	712.435	711.428	6
1120	F8-11	KDDDRD	779.323	778.309	6
1121	F8-11	EQTAWT	749.345	748.339	6
1122	F8-11	EETERE	806.362	805.345	6
1123	F8-11	SGPYWD	766.308	765.297	6
1124	F8-11	KEDQOA	745.338	744.329	6
1125	F8-11	EVDKKN	774.4	773.392	6
1126	F8-11	KGAPEA	614.315	613.307	6
1127	F8-11	RSAPPC	672.32	671.306	6
1128	F8-11	ETIPPT	699.366	698.349	6
1129	F8-11	KDYYLT	816.411	815.407	6
1130	F8-11	EGYSVD	683.291	682.281	6
1131	F8-11	EGQMWK	820.372	819.359	6
1132	F8-11	QRNWQH	884.411	883.405	6
1133	F8-11	QENLVT	717.377	716.37	6
1134	F8-11	QFRSPP	387.2	772.387	6
1135	F8-11	EGMWWW	936.362	935.364	6
1136	F8-11	RQCPGK	730.373	729.359	6
1137	F8-11	KDDSLG	648.32	647.313	6
1138	F8-11	RSEPEP	728.357	727.35	6
1139	F8-11	SAPLFT	677.351	676.343	6
1140	F8-11	QMRMNK	849.41	848.4	6
1141	F8-11	RSDELN	749.346	748.335	6
1142	F8-11	EPWWNV	844.405	843.392	6
1143	F8-11	EASDKR	721.352	720.34	6
1144	F8-11	KDDFEA	740.309	739.302	6
1145	F8-11	STQALT	662.337	661.328	6
1146	F8-11	EASAER	676.317	675.319	6
1147	F8-11	EPWDGL	758.328	757.328	6
1148	F8-11	QAAAPV	570.325	569.317	6
1149	F8-11	GYPSTE	695.286	694.281	6
1150	F8-11	LGDQLE	688.351	687.344	6
1151	F8-11	KDDDLQ	775.346	774.34	6
1152	F8-11	QTCQLE	763.327	762.322	6
1153	F8-11	EQFEVS	752.352	751.339	6
1154	F8-11	AVLMHN	698.363	697.358	6
1155	F8-11	QLENVD	733.336	732.329	6
1156	F8-11	EEKEYD	854.342	853.334	6
1157	F8-11	KDDDLE	748.334	747.329	6	Q25077;
1158	F8-11	EEASPL	687.329	686.312	6
1159	F8-11	EAEKEK	775.383	774.376	6
1160	F8-11	EVSSYN	740.31	739.302	6
1161	F8-11	KDDWNE	806.33	805.324	6
1162	F8-11	QGGCPR	631.292	630.291	6
1163	F8-11	CICGGK	596.257	595.246	6
1164	F8-11	MPFLTS	737.346	736.347	6
1165	F8-11	RCGPSY	724.314	723.301	6
1166	F8-11	VSCZSW	552.27	1102.52	6
1167	F8-11	ELAGVS	617.313	616.307	6
1168	F8-11	SGGGLL	545.293	544.286	6
1169	F8-11	QDMWWE	936.362	935.348	6
1170	F8-11	WKNPWG	829.405	828.392	6
1171	F8-11	PHPEAE	721.314	720.308	6
1172	F8-11	NGNMMV	679.295	678.283	6
1173	F8-11	WELGWK	860.437	859.423	6
1174	F8-11	ELENLA	704.343	703.339	6
1175	F8-11	KLTDSL	718.4	717.391	6
1176	F8-11	RDVPLV	740.43	739.423	6
1177	F8-11	ENGLVL	660.357	659.349	6
1178	F8-11	RTNHMA	745.337	744.334	6
1179	F8-11	ENLAKE	745.373	744.365	6
1180	F8-11	LEASPE	687.319	686.312	6
1181	F8-11	MMRPOM	792.356	791.349	6
1182	F8-11	KDLENE	761.368	760.36	6
1183	F8-11	ENTNWE	806.329	805.324	6
1184	F8-11	REQWNH	883.415	882.41	6
1185	F8-11	ENLNLA	715.362	714.355	6
1186	F8-11	HZECWR	627.792	1253.57	6
1187	F8-11	RSVDYL	768.39	767.381	6
1188	F8-11	QLEEED	778.308	777.303	6
1189	F8-11	MVLMPR	762.4	761.393	6
1190	F8-11	WIEPDK	829.4	828.402	6
1191	F8-11	QTAWSE	721.314	720.308	6
1192	F8-11	QPAVPG	582.325	581.317	6
1193	F8-11	PTNWEL	801.373	800.37	6
1194	F8-11	NGNERW	789.36	788.357	6
1195	F8-11	DRALEE	746.365	745.361	6
1196	F8-11	QQALEE	733.337	732.329	6
1197	F8-11	QPPYWH	843.37	842.371	6
1198	F8-11	LCDTDL	721.315	720.3	6
1199	F8-11	QAMEKE	777.336	776.337	6
1200	F8-11	LMAAAP	589.299	588.294	6
1201	F8-11	KGDPRQ	742.375	741.377	6
1202	F8-11	DDSDPF	709.266	708.26	6
1203	F8-11	ELDLEM	765.338	764.326	6
1204	F8-11	ENVEKE	789.362	788.355	6
1205	F8-11	SGGVAV	531.278	530.27	6
1206	F8-11	WWPLPG	769.4	768.396	6
1207	F8-11	KEVDAD	718.326	717.318	6
1208	F8-11	EARDWQ	820.35	819.351	6
1209	F8-11	LSGGGL	517.298	516.291	6
1210	F8-11	HPAPCG	595.274	594.258	6
1211	F8-11	MAALEE	705.312	704.305	6
1212	F8-11	WMWGEW	936.365	935.364	6
1213	F8-11	EPSYNL	764.354	763.339	6
1214	F8-11	LDGVGP	571.309	570.301	6
1215	F8-11	MLSELE	737.345	736.331	6
1216	F8-11	SDLTLQ	718.36	717.354	6
1217	F8-11	EKLGAG	616.33	615.323	6
1218	F8-11	MSKEEA	710.299	709.295	6
1219	F8-11	LGGEGEV	676.315	675.308	7	P08021;
1220	F8-11	QPALQN	684.368	683.36	6
1221	F8-11	EKEEPA	744.34	743.334	6
1222	F8-11	RELCPP	728.373	727.369	6
1223	F8-11	EDAAVF	667.293	666.286	6
1224	F8-11	LENLAA	672.356	671.349	6
1225	F8-11	HDVNQF	775.346	774.33	6
1226	F8-11	NVAVLS	616.367	615.359	6
1227	F8-11	HLEDDV	741.342	740.334	6
1228	F8-11	DGDAVL	603.299	602.291	6
1229	F8-11	WWGCFR	870.366	869.364	6
1230	F8-11	LEGPPT	629.312	628.307	6
1231	F8-11	KDDEMK	807.35	806.348	6
1232	F8-11	EASKLN	703.363	702.355	6	Q9U655;Q3YED6;P0CB09;P56713;Q9BPA2;
1233	F8-11	SDRPQV	743.358	742.361	6
1234	F8-11	KNKVSF	738.415	737.407	6
1235	F8-11	ENLVTA	688.352	687.344	6
1236	F8-11	EFHFNF	882.383	881.371	6
1237	F8-11	PSGDLQ	658.304	657.297	6
1238	F8-11	ENWFQQ	867.367	866.356	6
1239	F8-11	EPKYDA	764.346	763.339	6
1240	F8-11	FDQMWS	855.336	854.327	6
1241	F8-11	QPMVMQ	775.346	774.34	6
1242	F8-11	RQLDPE	771.399	770.392	6
1243	F8-11	LFPLEK	762.439	761.432	6
1244	F8-11	YVGGGH	603.298	602.281	6
1245	F8-11	WTCNWL	838.347	837.348	6
1246	F8-11	ESEWNT	779.319	778.313	6
1247	F8-11	ENVPLS	700.349	699.344	6
1248	F8-11	ESRSTN	735.335	734.319	6
1249	F8-11	ELNELE	746.363	745.349	6
1250	F8-11	ETFFFT	807.354	806.349	6
1251	F8-11	SGAAVL	559.309	558.301	6
1252	F8-11	QALDLE	730.364	729.354	6
1253	F8-11	QLENLS	717.377	716.37	6
1254	F8-11	SGLEMA	649.283	648.279	6
1255	F8-11	ESEEAF	725.294	724.292	6
1256	F8-11	RSADDV	678.31	677.298	6
1257	F8-11	RSYPST	726.344	725.334	6
1258	F8-11	YALEGE	697.302	696.297	6
1259	F8-11	APKRPI	362.229	722.444	6
1260	F8-11	QAAVLE	646.341	645.333	6
1261	F8-11	QPEKLT	731.393	730.386	6
1262	F8-11	TAAAYD	653.279	652.27	6
1263	F8-11	RDEYCQ	855.335	854.323	6
1264	F8-11	EDSKFE	796.333	795.329	6
1265	F8-11	MVTGAE	623.268	622.263	6
1266	F8-11	FDPPGY	737.316	736.307	6
1267	F8-11	NGPYWW	838.356	837.345	6
1268	F8-11	QPAEAL	642.346	641.338	6
1269	F8-11	EASALE	633.309	632.302	6
1270	F8-11	KPSALE	686.372	685.365	6
1271	F8-11	RENKLA	772.421	771.424	6
1272	F8-11	HWWLEH	923.409	922.409	6
1273	F8-11	RADDSL	692.324	691.314	6
1274	F8-11	FWSPPT	776.356	775.354	6
1275	F8-11	QSADLF	696.321	695.313	6
1276	F8-11	KDDVYS	768.339	767.334	6
1277	F8-11	ELRQTT	789.417	788.403	6
1278	F8-11	KDAQLT	717.378	716.37	6
1279	F8-11	KDWMRT	852.412	851.396	6
1280	F8-11	PELEKQ	785.405	784.397	6
1281	F8-11	YMQWOM	913.358	912.351	6
1282	F8-11	ELCLLT	733.388	732.373	6
1283	F8-11	WWVOWS	918.415	917.407	6
1284	F8-11	SVGNNL	645.321	644.313	6
1285	F8-11	ELAVWQ	759.402	758.396	6
1286	F8-11	WMPSYG	782.318	781.311	6
1287	F8-11	MRFDTS	798.35	797.338	6
1288	F8-11	EDDCPI	707.251	706.248	6
1289	F8-11	QOQKNE	801.372	800.366	6
1290	F8-11	KDDVFE	766.364	765.354	6
1291	F8-11	NVCLNE	705.317	704.316	6
1292	F8-11	KDDDLT	720.345	719.334	6
1293	F8-11	MQKSLN	762.373	761.374	6
1294	F8-11	WGYWDG	825.33	824.313	6
1295	F8-11	SGAVLE	617.313	616.307	6
1296	F8-11	DQPSPY	720.318	719.313	6
1297	F8-11	ESRSTQ	749.345	748.335	6
1298	F8-11	YLASPA	663.336	662.328	6
1299	F8-11	EAEASL	633.309	632.302	6
1300	F8-11	TVNVPL	328.702	655.39	6
1301	F8-11	KDDDGL	704.31	703.302	6
1302	F8-11	KDDFEI	782.358	781.349	6
1303	F8-11	EPWWLN	886.415	885.402	6
1304	F8-11	EGLDPV	645.309	644.302	6
1305	F8-11	EVALNE	690.33	689.323	6
1306	F8-11	LTACKE	678.345	677.342	6
1307	F8-11	HGYWDV	790.343	789.345	6
1308	F8-11	ENLFPD	750.338	749.323	6
1309	F8-11	SVAVLD	645.345	644.338	6
1310	F8-11	NGGMRF	695.321	694.322	6
1311	F8-11	EPIEWL	828.409	827.407	6
1312	F8-11	ENLTAD	704.31	703.302	6
1313	F8-11	EMQLDL	764.349	763.342	6
1314	F8-11	KDDLDQ	775.347	774.34	6
1315	F8-11	FRGTQH	787.383	786.377	6
1316	F8-11	RSPELW	803.413	802.397	6
1317	F8-11	DELNLW	831.384	830.381	6
1318	F8-11	NFPRPE	387.202	772.387	6
1319	F8-11	ELENEL	762.346	761.344	6
1320	F8-11	EDGFVW	794.331	793.328	6
1321	F8-11	ETAWTQ	749.346	748.339	6
1322	F8-11	RASDLD	692.323	691.314	6
1323	F8-11	QPCCVL	676.314	675.308	6
1324	F8-11	LTCCDI	681.292	680.287	6
1325	F8-11	ETRECN	765.321	764.312	6
1326	F8-11	YLASAP	663.337	662.328	6
1327	F8-11	ENLNPL	699.366	698.36	6
1328	F8-11	WGPVRA	727.398	726.381	6
1329	F8-11	LDVGPS	629.314	628.307	6
1330	F8-11	SLSALE	661.343	660.333	6
1331	F8-11	KDGDEL	690.329	689.323	6
1332	F8-11	QEASDL	704.31	703.302	6
1333	F8-11	EEASAL	619.294	618.286	6
1334	F8-11	MPWQEM	837.328	836.32	6
1335	F8-11	KPSDPV	656.361	655.354	6
1336	F8-11	LTCESL	681.307	680.305	6
1337	F8-11	KPSDEM	722.302	721.295	6
1338	F8-11	RTLDGT	678.346	677.334	6
1339	F8-11	WEVDQV	791.356	790.35	6
1340	F8-11	FFYIDR	902.448	901.433	6
1341	F8-11	QSPYDI	738.33	737.323	6
1342	F8-11	KPWDDL	789.376	788.37	6
1343	F8-11	EPGKSL	646.342	645.333	6
1344	F8-11	EMRCLP	764.346	763.336	6
1345	F8-11	ENGVLL	660.357	659.349	6
1346	F8-11	FPNGMR	735.369	734.353	6
1347	F8-11	EPVDLN	700.349	699.344	6
1348	F8-11	NTNLVP	671.372	670.365	6
1349	F8-11	QPELTT	730.36	729.354	6
1350	F8-11	EDKRET	793.374	792.361	6
1351	F8-11	VLWSEE	778.361	777.354	6
1352	F8-11	WWLVEP	845.426	844.412	6
1353	F8-11	EDQPQL	743.357	742.35	6
1354	F8-11	EVERSE	764.346	763.335	6
1355	F8-11	SVGDNI	646.304	645.297	6
1356	F8-11	EASFLV	681.346	680.338	6
1357	F8-11	LTEDVP	687.354	686.349	6	O01670;Q8N0N9;
1358	F8-11	KNPYVE	791.395	790.386	6
1359	F8-11	WWGTPQ	816.361	815.36	6
1360	F8-11	EPTYLR	820.423	819.413	6
1361	F8-11	EETRIQ	817.397	816.398	6
1362	F8-11	STIWSE	764.346	763.339	6
1363	F8-11	QRALCL	745.409	744.395	6
1364	F8-11	RSSSEA	650.314	649.303	6
1365	F8-11	EAAVLP	615.335	614.328	6
1366	F8-11	DGDLTI	647.325	646.317	6
1367	F8-11	MCIFYQ	820.34	819.33	6
1368	F8-11	ENLVSS	690.33	689.323	6
1369	F8-11	ORELLN	799.424	798.424	6
1370	F8-11	QALEEL	718.361	717.354	6	P21613;
1371	F8-11	ERESDL	764.351	763.335	6
1372	F8-11	SFTSLG	653.314	652.307	6
1373	F8-11	WPWFVP	845.431	844.427	6
1374	F8-11	FPNOKV	759.404	758.396	6
1375	F8-11	MLKDDV	736.354	735.347	6
1376	F8-11	QPTTAW	745.351	744.344	6
1377	F8-11	ETTWTR	835.395	834.387	6
1378	F8-11	HAMFLR	816.412	815.411	6
1379	F8-11	VTACRE	720.341	719.327	6
1380	F8-11	ENLTAE	690.331	689.323	6
1381	F8-11	EPVAVL	643.366	642.359	6
1382	F8-11	EVVTOQ	730.36	729.354	6
1383	F8-11	WNINWQ	902.417	901.408	6
1384	F8-11	ENLNLD	733.334	732.329	6
1385	F8-11	KTPNPV	669.393	668.386	6
1386	F8-11	ETLDQT	720.342	719.334	6
1387	F8-11	TSSFLG	653.314	652.307	6
1388	F8-11	QFNAPE	721.311	720.308	6
1389	F8-11	ISDGDL	633.309	632.302	6
1390	F8-11	QAAAEL	616.331	615.323	6
1391	F8-11	EGVLML	703.362	702.362	6
1392	F8-11	EVALEN	688.354	687.344	6
1393	F8-11	DGDVNL	646.303	645.297	6
1394	F8-11	PGSYVE	693.308	692.302	6
1395	F8-11	FTSSLG	653.314	652.307	6
1396	F8-11	KEAADE	704.311	703.302	6
1397	F8-11	EAPSVD	631.293	630.286	6
1398	F8-11	ENVALE	690.331	689.323	6
1399	F8-11	LVADYG	653.314	652.307	6
1400	F8-11	EGGTVF	623.304	622.296	6
1401	F8-11	ESQALE	690.33	689.323	6
1402	F8-11	RSDVPV	688.368	687.355	6
1403	F8-11	EKQEVQ	802.395	801.387	6
1404	F8-11	NAGEFL	666.309	665.302	6
1405	F8-11	EGPYVS	693.308	692.302	6
1406	F8-11	SGVTDL	633.309	632.302	6
1407	F8-11	EGLEGL	659.335	658.317	6
1408	F8-11	LGMESSGI	809.369	808.364	8	O17320;
1409	F8-11	EKDEEIDSI	1077.5	1076.49	9	O96064;
1410	F8-11	QVEEAEEI	946.438	945.429	8	P24733;
1411	F8-11	GK	246.145	245.138	2	Q86MA7;Q95P23;P20481;P08021;Q9NDE8;
1412	F8-11	VR	274.187	273.18	2	Q10584;Q10583;P24733;O61309;O96064;
1413	F8-11	HR	312.178	311.171	2	O61363;Q10584;Q10583;P12659;Q4KTY1;
1414	F8-11	GR	246.156	245.149	2	B3A0Q6;P42565;H2A0N4;Q9GSL0;B6E465;
1415	F8-11	VK	246.181	245.174	2	Q10583;B2DCR8;P24733;Q25410;O61363;
1416	F8-11	LR	288.203	287.196	2	Q05973;Q10583;Q07981;P42565;P15513;
1417	F8-11	LK	260.197	259.19	2	Q8WR62;Q10584;Q10583;Q25410;V5NAL9;
1418	F8-11	SH	243.109	242.102	2	Q8WR62;Q95P23;Q10583;Q10584;O61363;
1419	F8-11	QP	258.145	257.138	2	Q8WR62;B3A0Q2;B3A0S1;Q10584;P86957;
1420	F8-11	GL	189.127	188.116	2	P20481;Q8WR62;Q10583;B3A0P1;O61363;
1421	F8-11	CC	225.043	224.029	2	Q10583;Q10584;O61363;P86730;P84811;
1422	F8-11	IIEEZ	514.275	1026.54	5
1423	F8-11	VVHCPH	354.171	706.322	6
1424	F8-11	ZYPR	493.269	984.515	4
1425	F8-11	APEFWL	389.689	777.37	6
1426	F8-11	PK	244.166	243.158	2	Q8WR62;Q25434;A1X158;A1X159;Q25460;
1427	F8-11	PR	272.172	271.164	2	Q86MA7;Q9NDE8;H2A0L6;P41824;P86956;
1428	F8-11	ZGAAP	419.233	836.452	5
1429	F8-11	ZSYQR	552.28	1102.55	5
1430	F8-11	PPAPR	276.169	550.323	5	Q16956;B3A0Q1;
1431	F8-11	LPVKNO	363.214	724.412	6
1432	F8-11	LCLTYT	727.363	726.362	6
1433	F8-11	LDKDPK	379.208	756.402	6
1434	F8-11	NP	244.13	243.122	2	Q10584;O61363;Q25464;Q10583;H2A0M0;
1435	F8-11	LKVPNP	341.218	680.422	6
1436	F8-11	LTVPR	300.198	598.38	5
1437	F8-11	LWWPK	373.209	744.396	5
1438	F8-11	LGRPPT	328.69	655.365	6
1439	F8-11	ZSP	753.389	752.383	3
1440	F8-11	LAVPR	285.193	568.37	5
1441	F8-11	QPMROS	773.366	772.354	6
1442	F8-11	VFZMH	529.262	1056.52	5
1443	F8-11	VPRPPQ	354.214	706.413	6
1444	F8-11	EZ	672.338	671.325	2
1445	F8-11	LQRVP	313.704	625.391	5	P04962;
1446	F8-11	EEEEAF	769.289	768.281	6
1447	F8-11	QQRDES	778.343	777.325	6
1448	F8-11	LPVDPR	348.704	695.397	6
1449	F8-11	ZC	644.324	643.313	2
1450	F8-11	EKDYEEV	911.402	910.392	7	P41383;Q8T6A5;Q06331;P24635;
1451	F8-11	PFKPSP	357.694	713.375	6
1452	F8-11	LVMPR	329.192	656.368	5
1453	F8-11	QPTYD	665.281	664.27	5
1454	F8-11	LEELR	330.19	658.365	5	P22488;P16275;Q3L1C9;
1455	F8-11	QSRMNP	774.364	773.349	6
1456	F8-11	KDEEEA	762.315	761.308	6
1457	F8-11	DKDHAN	715.304	714.293	6
1458	F8-11	ZORYTT	589.302	1176.59	6
1459	F8-11	ZQ	671.339	670.341	2
1460	F8-11	LTTTGH	645.311	644.313	6
1461	F8-11	ZP	666.358	665.351	2
1462	F8-11	SVFGPN	636.297	635.291	6
1463	F8-11	EKDDDK	763.347	762.34	6
1464	F8-11	EARLEN	747.359	746.356	6
1465	F8-11	VALPR	286.182	570.349	5	Q2VF17;
1466	F8-11	ZGINOH	552.282	1102.55	6
1467	F8-11	KDGDEV	704.309	703.302	6
1468	F8-11	ELNLYV	766.399	765.391	6
1469	F8-11	LSVPR	293.191	584.365	5
1470	F8-11	IFOPK	316.194	630.374	5
1471	F8-11	QALNQEQ	844.416	843.409	7	Q3YEG0;Q9BPB0;A0A3G3C7V6;G1AS79;
1472	F8-11	LSZSO	471.257	940.499	5
1473	F8-11	AP	201.124	200.116	2	Q8WR62;Q9NDE8;A1X159;B3A0Q1;A1X158;
1474	F8-11	MFOWTS	798.355	797.342	6
1475	F8-11	EAEASF	669.273	668.265	6
1476	F8-11	WNYPSH	423.184	844.35	6
1477	F8-11	DL	247.129	246.122	2	Q10584;Q10583;P24733;Q25410;V5NAL9;
1478	F8-11	KP	244.166	243.158	2	Q25460;Q25434;Q27409;A1X158;B3A0P1;
1479	F8-11	EDMWEV	850.324	849.321	6
1480	F8-11	PFKPDP	357.694	713.375	6
1481	F8-11	ZDFW	989.477	988.478	4
1482	F8-11	MGVPR	287.163	572.31	5
1483	F8-11	DRRSGH	743.358	742.347	6
1484	F8-11	ZO	656.337	655.33	2
1485	F8-11	LAPPS	526.288	525.28	5
1486	F8-11	VPAAAP	539.319	538.311	6
1487	F8-11	QRQFEE	852.392	851.377	6
1488	F8-11	QSDAEEV	819.334	818.329	7	Q8WR62;
1489	F8-11	ZCT	773.369	772.355	3
1490	F8-11	EVDRD	647.305	646.292	5	Q25410;
1491	F8-11	ZON	770.388	769.373	3
1492	F8-11	EAEAFA	653.276	652.27	6	O96064;
1493	F8-11	LQRGH	624.348	623.35	5
1494	F8-11	QYQTTD	797.331	796.324	6
1495	F8-11	NEASDL	662.299	661.292	6
1496	F8-11	VVZSV	464.266	926.52	5
1497	F8-11	EQEVQA	745.336	744.329	6
1498	F8-11	LGGTFF	655.342	654.338	6
1499	F8-11	NGNYMA	683.288	682.274	6
1500	F8-11	ENLAAV	632.325	631.318	6
1501	F8-11	SDLENL	732.336	731.334	6
1502	F8-11	KDDVYC	756.315	755.316	6
1503	F8-11	ZPT	741.389	740.383	3
1504	F8-11	WPFFF	759.349	758.343	5
1505	F8-11	SSSVSF	655.292	654.286	6
1506	F8-11	EVRDOI	760.384	759.376	6
1507	F8-11	QPAPGY	648.298	647.291	6
1508	F8-11	EELENR	803.389	802.382	6
1509	F8-11	ESCTVL	667.303	666.289	6
1510	F8-11	LMPAH	584.293	583.279	5
1511	F8-11	LEEEKH	826.394	825.387	6
1512	F8-11	SLLSPR	714.414	713.407	6
1513	F8-11	KDDWDS	779.318	778.313	6
1514	F8-11	LFDPR	331.187	660.36	5
1515	F8-11	ELEEVD	775.327	774.328	6
1516	F8-11	WILPPR	399.235	796.46	6
1517	F8-11	KDDNAV	703.326	702.318	6
1518	F8-11	LVWAP	627.346	626.343	5
1519	F8-11	VLMAAP	615.362	614.346	6
1520	F8-11	QPCEKD	761.312	760.306	6
1521	F8-11	LYAEA	608.292	607.285	5
1522	F8-11	HCZ	783.361	782.351	3
1523	F8-11	LSVGGD	561.288	560.281	6
1524	F8-11	EQTTNW	792.352	791.345	6
1525	F8-11	HGDDEW	800.275	799.277	6
1526	F8-11	SSYPPN	680.291	679.281	6
1527	F8-11	HGYWDM	822.322	821.317	6
1528	F8-11	QVMSTS	694.303	693.3	6
1529	F8-11	DQPAYT	710.299	709.292	6
1530	F8-11	LQPANN	698.337	697.34	6
1531	F8-11	YLOWAO	792.4	791.385	6
1532	F8-11	ELEDDK	762.342	761.344	6
1533	F8-11	KHCLPA	684.357	683.342	6
1534	F8-11	IGNGLS	576.289	575.291	6
1535	F8-11	QISYPS	736.352	735.344	6
1536	F8-11	QPETCV	692.291	691.285	6
1537	F8-11	QRLGGG	601.333	600.334	6
1538	F8-11	KWSPW	745.373	744.36	5
1539	F8-11	LTAAGP	543.314	542.306	6
1540	F8-11	FYFNTD	820.35	819.344	6
1541	F8-11	DKRFGH	759.399	758.382	6
1542	F8-11	OT	247.129	246.122	2
1543	F8-11	EDAPEL	687.32	686.312	6
1544	F8-11	DPSYT	598.236	597.228	5
1545	F8-11	NELEEL	760.374	759.365	6
1546	F8-11	EGKRDL	733.389	732.377	6
1547	F8-11	QSYEEA	740.311	739.302	6
1548	F8-11	ZHLC	896.446	895.435	4
1549	F8-11	ZGP	695.386	694.378	3
1550	F8-11	AERDGT	664.295	663.282	6
1551	F8-11	LDLCC	582.227	581.219	5
1552	F8-11	LL	245.186	244.179	2	Q8WR62;Q10583;O61363;Q10584;Q05973;
1553	F8-11	LPRWPK	419.755	837.486	6
1554	F8-11	HGYWNE	821.318	820.314	6
1555	F8-11	PVFEEY	797.368	796.364	6
1556	F8-11	WPPR	597.324	596.307	4
1557	F8-11	ZMH	837.408	836.398	3
1558	F8-11	TSYPPV	705.344	704.338	6
1559	F8-11	KDDENL	775.346	774.34	6
1560	F8-11	ENPWQA	786.341	785.334	6
1561	F8-11	KPSVDA	632.326	631.318	6
1562	F8-11	DTWRAT	791.368	790.361	6
1563	F8-11	GRRAH	612.336	611.325	5
1564	F8-11	RALED	619.311	618.297	5	Q9XYZ0;
1565	F8-11	PGLVPR	326.711	651.407	6
1566	F8-11	KAHCLS	672.357	671.342	6
1567	F8-11	EKDDKL	763.384	762.376	6
1568	F8-11	ENRRDW	891.409	890.399	6
1569	F8-11	EHHESV	779.323	778.325	6
1570	F8-11	OGGZG	827.392	826.395	5
1571	F8-11	LVAPQ	543.314	542.306	5
1572	F8-11	KNDDNA	692.289	691.277	6
1573	F8-11	QLQDEA	745.337	744.329	6
1574	F8-11	LEFQIP	788.414	787.412	6
1575	F8-11	ZYSPR	522.788	1043.55	5
1576	F8-11	ESZO	898.428	897.421	4
1577	F8-11	KLSAP	557.331	556.322	5
1578	F8-11	LTACNP	632.306	631.3	6
1579	F8-11	QPPTLQ	699.367	698.36	6
1580	F8-11	LSSGNN	607.274	606.261	6
1581	F8-11	ZDE	785.375	784.373	3
1582	F8-11	NKTT	253.13	504.254	4	B3A0S1;Q6QM28;
1583	F8-11	LLCRHK	392.24	782.459	6
1584	F8-11	NZHN	906.459	905.448	4
1585	F8-11	NNGYPN	720.294	719.287	6
1586	F8-11	LYAEAA	679.33	678.322	6
1587	F8-11	VLLPK	285.205	568.395	5	Q8I0T3;Q6WV67;Q6WV88;Q6WV66;Q6WV69;
1588	F8-11	EGEKLG	648.321	647.313	6
1589	F8-11	ENACQL	691.309	690.301	6
1590	F8-11	LGPAAP	539.319	538.311	6
1591	F8-11	MZ	672.357	671.344	2
1592	F8-11	LAGGPT	557.294	556.286	6
1593	F8-11	PZFO	463.745	925.467	4
1594	F8-11	ILPDGQ	658.34	657.333	6
1595	F8-11	IWHF	644.326	643.312	4
1596	F8-11	IIZTT	499.287	996.562	5
1597	F8-11	DDEAFA	681.271	680.265	6
1598	F8-11	QYQPVS	763.354	762.355	6	B3A0S3;
1599	F8-11	ENMGMR	779.322	778.31	6
1600	F8-11	CVLLHC	701.346	700.34	6
1601	F8-11	ZKC	800.416	799.402	3
1602	F8-11	EIDWTA	776.355	775.339	6
1603	F8-11	HGFKPW	785.414	784.402	6
1604	F8-11	OTZTC	481.229	960.435	5
1605	F8-11	EDGWLW	819.367	818.36	6
1606	F8-11	KDWDES	821.323	820.324	6
1607	F8-11	QPTYGG	664.296	663.286	6
1608	F8-11	EIPFO	632.326	631.322	5
1609	F8-11	VSFGHN	676.314	675.298	6
1610	F8-11	VLLPR	597.409	596.401	5
1611	F8-11	EARDVP	728.358	727.35	6
1612	F8-11	OTZTT	480.246	958.473	5
1613	F8-11	VPLR	498.34	497.333	4	P02637;
1614	F8-11	AEIVH	582.325	581.317	5
1615	F8-11	KDWDDK	820.383	819.376	6
1616	F8-11	LFDLEN	766.363	765.354	6
1617	F8-11	QMRFG	680.328	679.311	5
1618	F8-11	STQQLD	733.335	732.329	6
1619	F8-11	VNZPC	478.733	955.456	5
1620	F8-11	PSKLEG	672.357	671.349	6
1621	F8-11	LVTPE	574.309	573.301	5	B6V6L0;
1622	F8-11	LGENLS	648.321	647.313	6
1623	F8-11	OZF	415.219	828.414	3
1624	F8-11	CVPVNN	661.3	660.29	6
1625	F8-11	KGHWQF	818.39	817.387	6
1626	F8-11	ELCVPV	659.336	658.336	6
1627	F8-11	LFAGLT	637.356	636.348	6
1628	F8-11	ILDZI	499.287	996.562	5
1629	F8-11	QKLGGA	615.347	614.339	6
1630	F8-11	LAPPT	514.288	513.28	5	Q964D9;P92179;Q964E1;Q964E2;Q964E0;
1631	F8-11	ENTIDW	793.335	792.329	6
1632	F8-11	EMQALG	664.297	663.29	6
1633	F8-11	LAGEVD	619.294	618.286	6
1634	F8-11	EEAKPS	676.315	675.308	6
1635	F8-11	LSLPK	286.195	570.374	5	P86788;
1636	F8-11	ZDGCGR	508.241	1014.47	6
1637	F8-11	ZNRPC	506.261	1010.51	5
1638	F8-11	SSADVF	667.293	666.286	6
1639	F8-11	KGGTEE	636.285	635.276	6
1640	F8-11	ZNGH	426.212	850.406	4
1641	F8-11	QALPV	543.314	542.306	5
1642	F8-11	SKYPPQ	735.367	734.36	6
1643	F8-11	QLIQS	604.331	603.323	5
1644	F8-11	EGESELV	804.361	803.355	7	O47479;Q00860;Q96186;P48897;
1645	F8-11	QPALTI	684.392	683.385	6
1646	F8-11	LNPKPV	341.218	680.422	6
1647	F8-11	LLSNPE	672.357	671.349	6
1648	F8-11	DSDNVD	680.238	679.23	6
1649	F8-11	ENGLLV	660.359	659.349	6
1650	F8-11	LNAAP	499.288	498.28	5
1651	F8-11	TMLGVC	639.281	638.277	6
1652	F8-11	DYPPS	594.241	593.233	5
1653	F8-11	WWEFWS	956.386	955.386	6
1654	F8-11	SVSSWG	664.297	663.286	6
1655	F8-11	TTAWE	623.268	622.26	5
1656	F8-11	QWCDFA	783.316	782.306	6
1657	F8-11	QNRCVP	730.375	729.359	6
1658	F8-11	ELEMV	634.318	633.304	5
1659	F8-11	EGRGTS	648.298	647.287	6
1660	F8-11	QTAWTG	705.314	704.313	6
1661	F8-11	VVAAP	470.297	469.29	5	B3A0Q1;
1662	F8-11	TTADY	612.252	611.244	5
1663	F8-11	EAKPSV	644.362	643.354	6
1664	F8-11	LPAAAP	553.334	552.327	6
1665	F8-11	TLOPN	571.309	570.301	5
1666	F8-11	EERLVS	774.391	773.392	6
1667	F8-11	HCRFPV	774.363	773.364	6
1668	F8-11	TMKYAT	728.358	727.357	6
1669	F8-11	LCLSGH	645.307	644.295	6
1670	F8-11	ENLVGG	602.316	601.307	6
1671	F8-11	LSVGGP	543.314	542.306	6
1672	F8-11	SVSFNG	652.293	651.286	6
1673	F8-11	SLLENG	674.334	673.328	6
1674	F8-11	QPQGLG	613.33	612.323	6
1675	F8-11	SMGSLA	607.276	606.268	6
1676	F8-11	DLEELD	749.311	748.313	6
1677	F8-11	EDTAWT	736.316	735.308	6
1678	F8-11	NNMKR	338.686	675.349	5
1679	F8-11	HNWLWV	896.447	895.434	6
1680	F8-11	HPNEW	696.32	695.303	5
1681	F8-11	MSLETD	737.296	736.295	6
1682	F8-11	LGKDDS	648.321	647.313	6
1683	F8-11	LLADQP	672.357	671.349	6
1684	F8-11	VCRRED	819.371	818.37	6
1685	F8-11	LNGDVP	628.33	627.323	6
1686	F8-11	ETRDAG	664.297	663.282	6
1687	F8-11	KDZGA	914.464	913.463	5
1688	F8-11	VP	229.155	228.147	2	Q8WR62;P86947;H2A0K6;P86948;H2A0K7;
1689	F8-11	KPWCP	644.325	643.315	5
1690	F8-11	ERMNPL	775.385	774.369	6
1691	F8-11	QRDVPV	729.38	728.382	6
1692	F8-11	NMQZSE	579.766	1157.51	6
1693	F8-11	EKQPVG	699.367	698.36	6
1694	F8-11	EPERLG	742.374	741.366	6
1695	F8-11	VLITH	598.356	597.349	5
1696	F8-11	LSLAAP	293.184	584.353	6
1697	F8-11	KPWCGV	703.363	702.352	6
1698	F8-11	LASPT	530.282	529.275	5
1699	F8-11	LDPF	507.245	506.238	4	H2A0M0;C6KYS2;
1700	F8-11	CIEVC	582.224	581.219	5
1701	F8-11	VYVYCD	775.326	774.326	6
1702	F8-11	KPCHVF	772.391	771.374	6
1703	F8-11	HQDHGW	795.315	794.31	6
1704	F8-11	IDWTPR	415.217	828.413	6
1705	F8-11	PSYIDG	693.311	692.302	6
1706	F8-11	LYPPPS	715.362	714.359	6
1707	F8-11	LTVFVY	757.409	756.406	6
1708	F8-11	ENLVV	589.321	588.312	5
1709	F8-11	MADDLA	649.282	648.279	6
1710	F8-11	DP	245.114	244.106	2	Q10583;Q10584;P42565;O61363;Q07981;
1711	F8-11	STACQL	664.296	663.29	6
1712	F8-11	LSLS	461.261	460.253	4	P01522;P86962;P12659;Q00945;P48893;
1713	F8-11	NGNWVW	789.361	788.361	6
1714	F8-11	OTYRPR	424.227	846.435	6
1715	F8-11	CIVWPQ	761.37	760.358	6
1716	F8-11	LTIFF	654.382	653.379	5
1717	F8-11	ECMOVW	822.311	821.309	6
1718	F8-11	VAAANQ	589.299	588.287	6
1719	F8-11	VPML	475.255	474.251	4	Q00227;Q2VF17;
1720	F8-11	QPSYK	664.329	663.323	5
1721	F8-11	LLTA	459.281	458.274	4	D6C4K2;P0C831;P0C8V9;P0C8V8;Q9XZL4;
1722	F8-11	EDERKG	749.344	748.335	6
1723	F8-11	QFEDSV	738.33	737.323	6
1724	F8-11	LFWQR	763.433	762.418	5
1725	F8-11	KDQPV	600.336	599.328	5
1726	F8-11	LH	283.175	282.169	2	Q10584;O61363;Q10583;P12659;H2A0M3;
1727	F8-11	LDSRS	593.294	592.282	5
1728	F8-11	LTEEAA	675.315	674.312	6
1729	F8-11	ISDGDV	619.294	618.286	6
1730	F8-11	KSNGDG	619.275	618.261	6
1731	F8-11	SGSTFV	639.3	638.291	6
1732	F8-11	LTCKNH	729.379	728.364	6
1733	F8-11	LFDSSS	669.31	668.302	6
1734	F8-11	LSLGDQ	646.341	645.333	6
1735	F8-11	LVAPE	544.298	543.29	5
1736	F8-11	ELEM	521.228	520.22	4	Q10584;P12031;
1737	F8-11	ZT	644.34	643.33	2	P00032;
1738	F8-11	LKHFPR	420.252	838.481	6
1739	F8-11	EAIOK	615.333	614.328	5
1740	F8-11	EAPSYP	679.295	678.286	6
1741	F8-11	KDDELD	750.315	749.308	6
1742	F8-11	VAVPS	514.288	513.28	5	B3A0Q7;
1743	F8-11	KPELA	599.34	598.333	5
1744	F8-11	NGNREW	789.364	788.357	6
1745	F8-11	EFEVRD	810.355	809.356	6
1746	F8-11	ZVQE	450.234	898.452	4
1747	F8-11	LTVVHE	713.383	712.376	6
1748	F8-11	LSVDQP	672.356	671.349	6
1749	F8-11	AVMDRH	742.367	741.359	6
1750	F8-11	KNVINA	700.399	699.392	6
1751	F8-11	LAFVVC	333.185	664.362	6
1752	F8-11	VEVD	475.24	474.233	4	H2A0P3;Q06BR2;Q10998;O02654;A0A3G3C7U7;
1753	F8-11	EETTVV	691.352	690.344	6
1754	F8-11	VPVAP	496.313	495.306	5
1755	F8-11	QGNZ	842.42	841.406	4
1756	F8-11	LSPL	429.27	428.263	4	Q967R6;Q3YEH1;Q9BPG6;P0CY77;Q95P23;
1757	F8-11	EQKSLP	743.393	742.386	6
1758	F8-11	LLDAA	544.298	543.29	5
1759	F8-11	LTILPN	684.429	683.422	6
1760	F8-11	QPAEQF	761.35	760.339	6
1761	F8-11	QSPSPY	720.319	719.313	6
1762	F8-11	EQEKEE	805.353	804.35	6
1763	F8-11	LAAVV	488.308	487.301	5
1764	F8-11	NGGLPV	570.325	569.317	6
1765	F8-11	ERMQV	676.351	675.337	5	A0A3G3C7U2;
1766	F8-11	QDLIPS	714.367	713.36	6
1767	F8-11	SGVVL	516.304	515.296	5	P0DQP0;P0C8G7;
1768	F8-11	ETGEKR	761.373	760.372	6
1769	F8-11	LKSPF	296.179	590.343	5
1770	F8-11	EPCWR	704.311	703.311	5
1771	F8-11	LIAQPA	654.382	653.375	6
1772	F8-11	LSROPH	369.7	737.382	6
1773	F8-11	MDYRPO	810.347	809.338	6
1774	F8-11	KDDSRA	707.335	706.325	6
1775	F8-11	QVDQPV	699.367	698.36	6
1776	F8-11	LCLATL	317.184	632.357	6
1777	F8-11	QPLCZG	1067.54	1066.52	6
1778	F8-11	QPHZ	889.463	888.458	4
1779	F8-11	VVRDPQ	729.379	728.382	6
1780	F8-11	LTMTT	580.299	579.294	5	P26714;
1781	F8-11	LIASPP	639.371	638.364	6
1782	F8-11	TAASAL	575.304	574.296	6
1783	F8-11	CVLFE	652.296	651.294	5
1784	F8-11	DDSVQV	676.314	675.308	6
1785	F8-11	HNGYVW	789.362	788.361	6
1786	F8-11	LGFLTY	755.403	754.39	6
1787	F8-11	LEAE	475.24	474.233	4	P24733;O96064;H2A0L4;P22488;P21613;
1788	F8-11	AKPLPR	362.229	722.444	6
1789	F8-11	VYQPWT	835.393	834.391	6
1790	F8-11	LVAAP	486.292	485.285	5
1791	F8-11	LLFF	553.333	552.331	4	Q05973;P48897;
1792	F8-11	MARE	548.256	547.242	4
1793	F8-11	EPEVPR	742.377	741.366	6
1794	F8-11	NTSWLR	409.707	817.408	6
1795	F8-11	QSPSYP	720.319	719.313	6
1796	F8-11	EEVAVV	687.354	686.349	6
1797	F8-11	LGSPL	502.287	501.28	5
1798	F8-11	QPYWD	750.31	749.302	5
1799	F8-11	EELLAG	673.338	672.333	6
1800	F8-11	DFAP	463.221	462.211	4	Q9BPJ0;Q9BPI8;Q8IU26;Q9BPI5;
1801	F8-11	LAYGGA	593.293	592.286	6
1802	F8-11	RDELDS	750.33	749.319	6
1803	F8-11	QDLIPD	714.366	713.36	6
1804	F8-11	LGV	302.207	301.2	3	B3A0Q0;P04962;O61363;Q00231;P48918;
1805	F8-11	VSSSRS	664.329	663.319	6
1806	F8-11	ESRNNM	766.311	765.308	6
1807	F8-11	PSYLMA	723.33	722.331	6
1808	F8-11	ENKRPA	728.398	727.398	6
1809	F8-11	KCZ	800.409	799.402	3
1810	F8-11	LPKP	496.313	495.306	4	H2A0L7;
1811	F8-11	KGGQSP	589.299	588.287	6
1812	F8-11	LLVPR	299.208	596.401	5
1813	F8-11	DTVL	461.26	460.253	4	P35394;
1814	F8-11	MPRD	532.262	531.248	4	P69770;
1815	F8-11	QSLQL	630.345	629.338	5
1816	F8-11	NGGV	360.194	359.18	4	B3A0Q6;P86964;H2A0N5;Q96186;
1817	F8-11	IKGPP	553.334	552.327	5
1818	F8-11	LPVPK	284.197	566.379	5
1819	F8-11	MVMR	550.287	549.277	4	C4N147;Q00230;
1820	F8-11	LQVAAP	612.371	611.364	6
1821	F8-11	LLNNPR	370.724	739.434	6
1822	F8-11	EPGLYN	708.322	707.313	6
1823	F8-11	LGGMRM	680.329	679.315	6
1824	F8-11	SGGVLE	603.298	602.291	6
1825	F8-11	KDVEYD	810.351	809.344	6
1826	F8-11	LTPPT	544.296	543.29	5
1827	F8-11	MLEDDV	735.331	734.316	6
1828	F8-11	KNOOEV	757.372	756.365	6
1829	F8-11	LGVP	399.26	398.253	4	O61363;Q10584;
1830	F8-11	ETLFPS	735.365	734.349	6
1831	F8-11	ELENLV	732.378	731.37	6
1832	F8-11	TDROE	649.282	648.271	5
1833	F8-11	ETCZ	876.396	875.382	4
1834	F8-11	LLGGP	470.298	469.29	5	Q10584;
1835	F8-11	TRDGT	565.263	564.25	5
1836	F8-11	KNWEDA	804.356	803.345	6
1837	F8-11	ZPL	376.227	750.44	3
1838	F8-11	DLDLCC	697.253	696.246	6
1839	F8-11	QGNYW	681.306	680.292	5
1840	F8-11	TRGIHE	364.689	727.361	6
1841	F8-11	NZR	420.233	838.442	3
1842	F8-11	DKQLQN	759.403	758.392	6
1843	F8-11	EARRCL	789.398	788.396	6
1844	F8-11	ETSYP	610.271	609.265	5
1845	F8-11	AL	219.134	218.127	2	Q10584;Q10583;O61363;Q8WR62;Q8ISH7;
1846	F8-11	TTVCPO	649.282	648.279	6
1847	F8-11	NGLVPK	335.2	668.386	6
1848	F8-11	IDWTAD	734.336	733.328	6
1849	F8-11	HZGO	850.427	849.411	4
1850	F8-11	QPYNSE	779.321	778.313	6
1851	F8-11	EDPVFA	693.304	692.302	6
1852	F8-11	ZK	336.191	670.378	2	P00032;
1853	F8-11	EAFDDV	711.283	710.276	6
1854	F8-11	DFRVMH	846.387	845.385	6
1855	F8-11	LCCRDV	724.314	723.304	6
1856	F8-11	QPAYWW	850.389	849.381	6
1857	F8-11	KDYDTV	782.355	781.349	6
1858	F8-11	EVDLSP	673.339	672.333	6
1859	F8-11	NLGAF	563.282	562.275	5	P0DM17;
1860	F8-11	QAVLAG	600.336	599.328	6
1861	F8-11	LNAAPL	614.351	613.344	6
1862	F8-11	DDVYSV	711.319	710.312	6
1863	F8-11	SP	245.113	244.106	2	Q8WR62;Q9NDE8;A9ZPC9;Q10584;Q967R6;
1864	F8-11	NVPK	499.288	498.28	4	H2A0K6;P86947;
1865	F8-11	LTIDQP	702.367	701.36	6
1866	F8-11	DVLPM	590.286	589.278	5
1867	F8-11	WLN	474.238	473.227	3	Q05976;H2A0M0;Q00224;Q06BR2;B3A0P6;
1868	F8-11	GKREVT	366.201	730.397	6	A0A5C1ZW08;A0A5C1ZXT8;A0A5C2A2T2;
1869	F8-11	MMZ	789.377	788.369	3
1870	F8-11	EKYDDK	839.377	838.371	6
1871	F8-11	EDZW	973.446	972.431	4
1872	F8-11	KDWNKD	847.389	846.387	6
1873	F8-11	QELENK	802.394	801.387	6
1874	F8-11	SNAVLP	642.346	641.338	6
1875	F8-11	QEVDLV	718.361	717.354	6
1876	F8-11	CMFPPT	711.284	710.277	6
1877	F8-11	VDPPL	540.303	539.296	5
1878	F8-11	ESLKP	589.32	588.312	5
1879	F8-11	SNAAVV	602.315	601.307	6
1880	F8-11	QGDZAM	1045.48	1044.47	6
1881	F8-11	ZCR	828.411	827.409	3
1882	F8-11	LQAP	442.266	441.259	4
1883	F8-11	KDDFVG	722.336	721.328	6
1884	F8-11	LNLAAP	612.371	611.364	6
1885	F8-11	ELQQPV	727.398	726.391	6
1886	F8-11	TPVPT	530.282	529.275	5
1887	F8-11	EPDYFV	811.344	810.344	6
1888	F8-11	CVKWML	795.389	794.382	6
1889	F8-11	HTKWAK	786.435	785.418	6
1890	F8-11	VLAT	445.266	444.258	4	O01670;P28879;P0C1X1;P0CY79;D9IWN7;
1891	F8-11	CVNNPL	701.332	700.321	6
1892	F8-11	ETLEEV	735.331	734.333	6
1893	F8-11	EKVCP	589.299	588.294	5	P29241;
1894	F8-11	NKHRH	367.197	732.378	5
1895	F8-11	KDYDTE	812.327	811.324	6
1896	F8-11	EDZS	874.396	873.384	4
1897	F8-11	KNSNN	576.267	575.266	5
1898	F8-11	ETTW	550.252	549.243	4	P82186;
1899	F8-11	LTWWEP	845.426	844.412	6
1900	F8-11	LNVDAP	642.344	641.338	6
1901	F8-11	EDZ	813.378	812.368	3
1902	F8-11	LLS	374.228	373.221	3	Q34179;Q00231;B2DCR8;Q9BHA0;P0DKP4;
1903	F8-11	LSNPFG	650.315	649.307	6
1904	F8-11	QPYWDA	821.347	820.339	6
1905	F8-11	EASLYG	653.314	652.307	6
1906	F8-11	LSLDVN	702.365	701.36	6
1907	F8-11	ZEL	392.219	782.43	3
1908	F8-11	EAQSKT	677.351	676.339	6
1909	F8-11	PSVGNV	614.314	613.307	6
1910	F8-11	TLAPE	546.277	545.27	5
1911	F8-11	NYPPSS	680.293	679.281	6
1912	F8-11	VIOPQ	585.324	584.317	5
1913	F8-11	ZMT	775.38	774.371	3
1914	F8-11	FZAO	900.467	899.451	4
1915	F8-11	EDKDKA	721.345	720.329	6
1916	F8-11	LDL	360.212	359.206	3	B3A0P1;V5NAL9;P29241;W1I921;Q10583;
1917	F8-11	TOIPPQ	682.378	681.37	6
1918	F8-11	LPVT	471.281	470.274	4	H2A0M3;Q9U619;O77408;P0C1Y2;
1919	F8-11	LPGL	399.26	398.253	4	O15973;A0A0F6QDA5;A0A3G6IHA6;B3A0P1;H2A0L6;
1920	F8-11	VPVP	425.276	424.269	4	H2A0K6;P86947;G1C1T1;P13952;P86948;
1921	F8-11	EDYRMG	786.309	785.301	6
1922	F8-11	KTEAVP	686.373	685.365	6
1923	F8-11	ELMEL	650.314	649.299	5
1924	F8-11	LVVV	445.302	444.295	4	Q06BR2;P0DUB0;I0CME8;I0CME7;C0HKM3;
1925	F8-11	EQALP	571.309	570.301	5
1926	F8-11	VEOM	507.21	506.205	4
1927	F8-11	EVTPK	615.335	614.328	5
1928	F8-11	ENLRLG	717.38	716.382	6
1929	F8-11	WEDL	576.267	575.259	4
1930	F8-11	LAGDVP	585.324	584.317	6
1931	F8-11	KPSTQP	671.372	670.365	6
1932	F8-11	ZCH	809.368	808.366	3
1933	F8-11	ZR	363.211	724.399	2
1934	F8-11	NLLV	472.313	471.306	4	Q7SIG4;Q16956;Q10583;H2A0N9;
1935	F8-11	LGAAP	442.266	441.259	5
1936	F8-11	QPAWLR	784.455	783.439	6
1937	F8-11	QGILPR	363.22	724.423	6
1938	F8-11	VOLPPQ	682.374	681.37	6
1939	F8-11	LKEEPE	786.387	785.381	6
1940	F8-11	WNNPK	700.35	699.334	5
1941	F8-11	AYKPDT	708.356	707.349	6
1942	F8-11	TRNEMN	806.354	805.339	6
1943	F8-11	ZDT	380.182	758.357	3
1944	F8-11	YGH	392.148	391.149	3	Q95P23;Q3YEE1;B3A0P9;Q967R6;Q93134;
1945	F8-11	QLSLQD	745.374	744.365	6
1946	F8-11	KWSEPV	759.404	758.396	6
1947	F8-11	EQLQPV	727.398	726.391	6
1948	F8-11	SLEWPR	401.221	800.418	6
1949	F8-11	RWFSA	708.356	707.339	5
1950	F8-11	TPQPEL	700.35	699.344	6
1951	F8-11	QVPT	486.257	485.249	4	Q9TVR4;Q9UA95;B3A0R3;Q9UA71;Q9BP86;
1952	F8-11	ENTVVS	690.331	689.323	6
1953	F8-11	LSPPT	530.283	529.275	5	P12659;O61363;P86969;
1954	F8-11	TTFAG	538.252	537.243	5
1955	F8-11	LO	261.145	260.137	2
1956	F8-11	EQEYLP	778.36	777.354	6
1957	F8-11	EETEIV	735.334	734.333	6
1958	F8-11	LTAE	475.24	474.233	4	B3A0S3;P81732;Q10584;Q6QM28;
1959	F8-11	CLLPQ	589.299	588.294	5
1960	F8-11	VSSEVD	677.296	676.292	6
1961	F8-11	KNDDER	792.346	791.341	6
1962	F8-11	VTEZI	493.266	984.525	5
1963	F8-11	DVYSVG	653.314	652.307	6
1964	F8-11	EYWRD	810.348	809.334	5
1965	F8-11	RZ	699.4	698.384	2
1966	F8-11	ESSZ	846.387	845.389	4
1967	F8-11	CTVSPE	649.283	648.279	6
1968	F8-11	EFGSP	578.248	577.238	5
1969	F8-11	ZMQ	828.412	827.397	3
1970	F8-11	QVPDD	615.263	614.255	5
1971	F8-11	LPFH	257.145	512.275	4
1972	F8-11	HNCWKA	800.343	799.344	6
1973	F8-11	LDVPS	572.294	571.285	5
1974	F8-11	MPDWDV	776.326	775.321	6
1975	F8-11	VLAPQ	543.314	542.306	5
1976	F8-11	VCLAT	520.277	519.273	5
1977	F8-11	IOZST	479.253	956.494	5
1978	F8-11	ENLFP	635.305	634.296	5	Q9U651;Q9U654;P56714;P0C905;P69759;
1979	F8-11	SGLALP	599.34	598.333	6
1980	F8-11	ENLSLP	686.373	685.365	6
1981	F8-11	LNPPL	567.351	566.343	5
1982	F8-11	EISNPE	704.31	703.302	6
1983	F8-11	ESKW	563.283	562.275	4
1984	F8-11	WLNPQ	673.339	672.323	5
1985	F8-11	MZO	394.197	786.371	3
1986	F8-11	WDIPR	364.689	727.365	5
1987	F8-11	ZM	700.35	699.339	2
1988	F8-11	KDDVVP	686.375	685.365	6
1989	F8-11	ENLSPE	704.307	703.302	6
1990	F8-11	KTMSG	565.26	564.258	5
1991	F8-11	ENGVLM	678.31	677.305	6
1992	F8-11	EAAAVF	623.304	622.296	6
1993	F8-11	WKED	591.278	590.27	4
1994	F8-11	QSLSLP	686.373	685.365	6
1995	F8-11	LNPVP	553.335	552.327	5
1996	F8-11	EYZ	835.395	834.389	3
1997	F8-11	ENVTPE	704.31	703.302	6
1998	F8-11	EVGSGW	648.298	647.291	6
[truncated: 79 more rows]

## Sheet: Table S2
Table S2 Peptide Ranker score of peptides
NO.	Sequence	Peptide ranker score
1	FW	0.998829
2	WPFFF	0.998328
3	WPW	0.996841
4	WWL	0.994895
5	WWGCFR	0.994884
6	FRW	0.994645
7	FDMWWC	0.994329
8	FCWL	0.994321
9	FWWPK	0.992675
10	HGFFF	0.992553
11	FOPF	0.992448
12	WFZC	0.991771
13	WFTW	0.990748
14	WWWV	0.990033
15	FFFGR	0.990003
16	WGWR	0.989392
17	WPFPR	0.989326
18	WPWFVP	0.988904
19	MMWP	0.988837
20	FPNMW	0.988271
21	WWPLPG	0.986616
22	WGIW	0.986403
23	QWGF	0.986288
24	WWGMWS	0.983768
25	WYPPC	0.983608
26	RYPFF	0.983255
27	QWWEWW	0.983064
28	EGMWWW	0.982665
29	DPFFPL	0.982618
30	FPML	0.982569
31	YFMMMM	0.982186
32	WGWAFH	0.982091
33	WYPPCL	0.981993
34	FFFLLG	0.981864
35	LLFF	0.981767
36	WGWIDW	0.981625
37	WWPQ	0.981137
38	WWQEWW	0.980281
39	WGMWWE	0.979707
40	FVWCP	0.9789
41	WWVM	0.977855
42	WNWFQ	0.977532
43	FDYF	0.977469
44	FCZ	0.977082
45	WPPR	0.977007
46	WTPPW	0.975516
47	FPPWPQ	0.975365
48	NGPYWW	0.975358
49	FGWDWK	0.975355
50	WMWGEW	0.974904
51	ZDFW	0.974691
52	WMWWGE	0.974634
53	FPGMR	0.97462
54	WDRW	0.973983
55	FMPR	0.973842
56	ECFFYW	0.973784
57	FVWCPP	0.973336
58	MPOWPL	0.971539
59	FNWR	0.970907
60	IWHF	0.968445
61	WGZ	0.967845
62	WQFO	0.966808
63	KPWCP	0.966028
64	LWWPK	0.965965
65	FGRPM	0.96373
66	FPWIPN	0.963694
67	QPWML	0.962983
68	WWEFWS	0.960554
69	WCDPFD	0.960431
70	FGZ	0.958158
71	DPF	0.955551
72	FCGICL	0.952974
73	QPAYWW	0.952754
74	CC	0.952652
75	WGSFWQ	0.95238
76	FIDWPR	0.949892
77	FDPVF	0.949334
78	WGYWDG	0.948858
79	MGDF	0.946359
80	WCGSPL	0.946002
81	FMFPRH	0.945458
82	RGCWLP	0.945298
83	FWSPPT	0.941179
84	QOWCL	0.940708
85	WCPFDD	0.940337
86	NGMRF	0.940329
87	FTYPGW	0.93954
88	KWSPW	0.939317
89	APEFWL	0.938286
90	QWCDFA	0.937232
91	RWFLH	0.936926
92	FFGMGH	0.936236
93	FCPTWA	0.936126
94	FHGWLN	0.935264
95	FWGYOH	0.934628
96	WTCNWL	0.934069
97	OZF	0.932337
98	WKNPWG	0.932164
99	WPPWTV	0.931976
100	CMFPPT	0.931635
101	FPWCDD	0.931042
102	PGCKPW	0.929271
103	FPNGMR	0.926896
104	MPVW	0.926167
105	FGGGLM	0.925399
106	FRPMN	0.923688
107	WILPPR	0.92348
108	NGGMRF	0.92287
109	QMGYW	0.922675
110	WTPPL	0.922241
111	WPRCQL	0.921407
112	WGTWDM	0.921109
113	FGPDL	0.920849
114	FDPPGY	0.920119
115	LFWQR	0.919454
116	WLMSMP	0.918126
117	FPPT	0.916779
118	WHPO	0.915839
119	FCDRDW	0.915664
120	WZGO	0.912903
121	QMGFR	0.912493
122	LDPF	0.911747
123	PZFO	0.911713
124	QPPYWH	0.911204
125	MMLCL	0.910537
126	HGFKPW	0.910418
127	MMZ	0.908413
128	EPWWLN	0.906908
129	EDGWLW	0.90627
130	WPGDLR	0.905692
131	FCT	0.903071
132	QMRFG	0.902462
133	LGGTFF	0.902457
134	EFHFNF	0.901762
135	RGGGW	0.901695
136	WMPSYG	0.900522
137	YMQWOM	0.899895
138	WWVOWS	0.898826
139	FFYIDR	0.896152
140	MTF	0.894622
141	CRML	0.89228
142	WPADRL	0.890759
143	FLFLT	0.889044
144	MPZ	0.888582
145	EPCWR	0.886479
146	WEWSAW	0.883528
147	HAMFLR	0.880763
148	FNWQPA	0.87974
149	FPTYPP	0.87893
150	TCMMAW	0.878796
151	QPAWLR	0.878385
152	WLN	0.875591
153	CVKWML	0.875412
154	MLWPQ	0.874658
155	FGFGLV	0.873324
156	EGPFLL	0.872911
157	RWPPT	0.872624
158	WOWLDN	0.87124
159	MRFAFN	0.868626
160	WRMQ	0.867468
161	RMML	0.867131
162	WRCK	0.866932
163	FMROO	0.866537
164	LPFH	0.866339
165	HGYWDM	0.866115
166	RSPWR	0.864057
167	LTIFF	0.86038
168	WWGTPQ	0.85947
169	SGPYWD	0.858716
170	MMRPOM	0.857993
171	EGPTWW	0.857453
172	FCGKR	0.85636
173	WDIPR	0.85584
174	QWMGMD	0.855066
175	WEGRMM	0.854811
176	QDMWWE	0.852497
177	FDQMWS	0.850186
178	KGHWQF	0.849438
179	QMPINW	0.849014
180	RCLHLF	0.848642
181	NGNWVW	0.84774
182	WASPMA	0.847393
183	KDPWWE	0.846491
184	YYDDFM	0.846209
185	ZM	0.845766
186	SGSFL	0.844724
187	YIDWPR	0.844407
188	RAGFP	0.844386
189	HSWYFS	0.844338
190	FDNGRC	0.84386
191	MZ	0.842304
192	FGRROM	0.842022
193	LPRWPK	0.84152
194	FESWSW	0.841144
195	WZMS	0.84042
196	FPSDL	0.838675
197	FSFRGH	0.838332
198	WRNDPL	0.837224
199	HGMVLF	0.836231
200	HPAPCG	0.83559
201	MHNF	0.834919
202	FKGPR	0.83257
203	QPYWD	0.831901
204	HNWLWV	0.828892
205	FPSYQL	0.828752
206	FMGQR	0.827995
207	RWFSA	0.827975
208	ZFPK	0.82747
209	FGMRQ	0.826485
210	WGGDDM	0.826326
211	ZC	0.825338
212	KMPWPV	0.824542
213	KPWCGV	0.823271
214	WSEWMT	0.823054
215	KDWDPL	0.823049
216	RP	0.822267
217	WSZ	0.820606
218	PFKPDP	0.819904
219	WZD	0.815193
220	LPGL	0.814575
221	WVPR	0.814433
222	WRVWPQ	0.811947
223	FLGPT	0.81139
224	LGGPL	0.809468
225	GL	0.808777
226	FCVR	0.807963
227	QPDVFM	0.807418
228	ZGP	0.804561
229	WHGH	0.80434
230	QPCCVL	0.804146
231	DFAP	0.803539
232	PPAPR	0.803504
233	FEPGSF	0.800114

## Sheet: Table S3
Table S3 Peptide CPP score, toxicity, and allergenicity of peptides
NO.	Sequence	Peptide CPP score	Toxicity	Allergenicity
1	RP	0.814277	Non-Toxin	PROBABLE ALLERGEN
2	WRCK	0.765481	Non-Toxin	PROBABLE ALLERGEN
3	LPRWPK	0.748643	Non-Toxin	PROBABLE ALLERGEN
4	WVPR	0.710597	Non-Toxin	PROBABLE ALLERGEN
5	RSPWR	0.70576	Non-Toxin	PROBABLE NON-ALLERGEN
6	WGWR	0.696949	Non-Toxin	PROBABLE ALLERGEN
7	RMML	0.692425	Non-Toxin	PROBABLE ALLERGEN
8	QPAWLR	0.668487	Non-Toxin	PROBABLE ALLERGEN
9	LWWPK	0.656787	Non-Toxin	PROBABLE ALLERGEN
10	WWL	0.652974	Non-Toxin	PROBABLE NON-ALLERGEN
11	CRML	0.641265	Non-Toxin	PROBABLE ALLERGEN
12	WRMQ	0.632769	Non-Toxin	PROBABLE ALLERGEN
13	WRVWPQ	0.620382	Non-Toxin	PROBABLE ALLERGEN
14	WPPR	0.595732	Non-Toxin	PROBABLE ALLERGEN
15	RWPPT	0.577716	Non-Toxin	PROBABLE ALLERGEN
16	WWWV	0.557845	Non-Toxin	PROBABLE NON-ALLERGEN
17	WPRCQL	0.548497	Non-Toxin	PROBABLE NON-ALLERGEN
18	CVKWML	0.536297	Non-Toxin	PROBABLE NON-ALLERGEN
19	RGCWLP	0.533606	Non-Toxin	PROBABLE ALLERGEN
20	WDRW	0.523531	Non-Toxin	PROBABLE NON-ALLERGEN

## Sheet: Table S4
Table S4 Atomic charge distribution and bond length of predicted active sites of the six peptides
Peptide	RSPWR		WDRW		WWL		WWWV				WPRCQL		CVKWML
Mulliken charge	31C	-0.16958	8C	0.003252	8C	0.008882	8C	0.013522	21C	-0.168683	8C	0.005131	29C	-0.154137
	32C	-0.117529	9C	0.052615	9C	0.052864	9C	0.047383	22C	-0.117948	9C	0.052952	30C	-0.123152
	33C	-0.127388	10N	-0.604265	10N	-0.603531	10N	-0.61283	23C	-0.127549	10N	-0.603963	31C	-0.128706
	34C	-0.113936	11C	0.269071	11C	0.271346	11C	0.27286	24C	-0.114849	11C	0.270196	32C	-0.117778
	35C	0.053474	12C	0.052069	12C	0.041795	12C	0.044878	25C	0.055229	12C	0.045375	33C	0.048355
	36C	0.269662	13C	-0.113614	13C	-0.113297	13C	-0.114419	26C	0.268498	13C	-0.11385	34C	0.265745
	37N	-0.606056	14C	-0.128293	14C	-0.127508	14C	-0.127399	27N	-0.608724	14C	-0.127571	35N	-0.604447
	38C	0.047492	15C	-0.117166	15C	-0.116764	15C	-0.117567	28C	0.048759	15C	-0.117286	36C	0.047792
	39C	0.02849	16C	-0.171728	16C	-0.1677	16C	-0.165952	29C	0.02377	16C	-0.165723	37C	0.016271
	79H	0.096561	55H	0.131425	44H	0.13268	57H	0.133213	65H	0.095073	63H	0.131765	84H	0.095188
	80H	0.090698	56H	0.291502	45H	0.292286	58H	0.291361	66H	0.089684	64H	0.292081	85H	0.08532
	81H	0.094256	57H	0.103099	46H	0.103923	59H	0.102959	67H	0.093248	65H	0.103627	86H	0.08996
	82H	0.103833	58H	0.093546	47H	0.094181	60H	0.093553	68H	0.102805	66H	0.094065	87H	0.099377
	83H	0.291664	59H	0.089911	48H	0.090379	61H	0.089773	69H	0.290077	67H	0.090483	88H	0.289066
	84H	0.132741	60H	0.092747	49H	0.095765	62H	0.094419	70H	0.136602	68H	0.096699	89H	0.127013
Bond length (Å)	31C-79H	1.0867	9C-55H	1.0811	9C-44H	1.081	9C-57H	1.0806	21C-65H	1.0867	9C-63H	1.0811	29C-84H	1.0847
	32C-80H	1.0861	10N-56H	1.0082	10N-45H	1.0083	10N-58H	1.0081	22C-66H	1.0861	10N-64H	1.0083	30C-85H	1.0864
	33C-81H	1.086	13C-57H	1.0859	13C-46H	1.0858	13C-59H	1.0859	23C-67H	1.086	13C-65H	1.0859	31C-86H	1.0862
	34C-82H	1.0859	14C-58H	1.086	14C-47H	1.086	14C-60H	1.086	24C-68H	1.0859	14C-66H	1.086	32C-87H	1.0861
	37N-83H	1.0081	15C-59H	1.0861	15C-48H	1.0861	15C-61H	1.0861	27N-69H	1.0081	15C-67H	1.0861	35N-88H	1.0081
	38C-84H	1.081	16C-60H	1.0866	16C-49H	1.0866	16C-62H	1.0865	28C-70H	1.0812	16C-68H	1.0862	36C-89H	1.0813

## Sheet: Fig. S1
Fig. S1 Pearson correlation analysis between the results obtained in silico, in vitro, and in cellular. * P<0.05, ** P<0.01, *** P<0.001.
